# Supplementary material for: Genomic epidemiology of dominant lineages of Streptococcus pyogenes emm types between 1993-2020, in China
Source: Research Square preprint supplement (doi:10.21203/rs.3.rs-5922137/v1), 2025-02-27
Supplement: Supplementary file 1 [file 482b49037c7f6def5928790b.xlsx]

## Sheet: Newly sequenced strains
Strain	emm type	Year	Province/City	Source	Clinical	Accession number
1993BJGAS02	1	1993	Beijing	Throat	Scarlet fever	JBJFYW000000000
1993BJGAS14	1	1993	Beijing	Throat	Pharyngeal tonsillitis	JBJFYV000000000
emm1-PSGN-93-BJ-044	1	1993	Beijing	Throat	APSGN	JBJFRT000000000
emm1-PSGN-93-BJ-063	1	1993	Beijing	Throat	APSGN	JBJFRS000000000
emm1-PSGN-93-BJ-066	1	1993	Beijing	Throat	APSGN	JBJFRR000000000
emm1-PT-93-BJ-036	1	1993	Beijing	Throat	Pharyngeal tonsillitis	JBJFRA000000000
emm1-PT-93-BJ-069	1	1993	Beijing	Throat	Pharyngeal tonsillitis	JBJFQZ000000000
emm1-PT-93-BJ-079	1	1993	Beijing	Throat	Pharyngeal tonsillitis	JBJFQY000000000
emm1-SF-93-BJ-024	1	1993	Beijing	Throat	Scarlet fever	JBJFQL000000000
emm1-SF-93-BJ-042	1	1993	Beijing	Throat	Scarlet fever	JBJFQK000000000
emm1-SF-93-BJ-050	1	1993	Beijing	Throat	Scarlet fever	JBJFQJ000000000
emm1-TYM-93-BJ-048	1	1993	Beijing	External auditory canal secretions	Tympanitis	JBJFQE000000000
GAS02-M1-BJ93	1	1993	Beijing	Throat	Pharyngeal tonsillitis	JBJFPM000000000
GAS12-BJ93	1	1993	Beijing	Throat	Pharyngeal tonsillitis	JBJFPL000000000
GAS14-M1-BJ93	1	1993	Beijing	Throat	Pharyngeal tonsillitis	JBJFPK000000000
1993BJGAS03	12	1993	Beijing	Throat	Impetigo	JBJCVA000000000
1993BJGAS07impetigo	12	1993	Beijing	Skin	Impetigo	JBJCUZ000000000
1993BJGAS10	12	1993	Beijing	Throat	Scarlet fever	JBJCUY000000000
1993BJGAS18	12	1993	Beijing	Throat	Pharyngeal tonsillitis	JBJCUX000000000
emm12-IMP-93-BJ-025	12	1993	Beijing	Skin	Impetigo	JBJCNQ000000000
emm12-PT-93-BJ-073	12	1993	Beijing	Throat	Pharyngeal tonsillitis	JBJCNA000000000
emm12-PT-93-BJ-084	12	1993	Beijing	Throat	Pharyngeal tonsillitis	JBJCMZ000000000
1994BJGAS01	1	1994	Beijing	NA	NA	JBJFYU000000000
emm1-TYM-94-BJ-113	1	1994	Beijing	External auditory canal secretions	Tympanitis	JBJFQD000000000
emm1-TYM-94-BJ-117	1	1994	Beijing	External auditory canal secretions	Tympanitis	JBJFQC000000000
emm1-TYM-94-BJ-131	1	1994	Beijing	External auditory canal secretions	Tympanitis	JBJFQB000000000
GAS01-M1-BJ94	1	1994	Beijing	NA	NA	JBJFPN000000000
emm12-PSGN-94-BJ-098	12	1994	Beijing	Throat	APSGN	JBJCNO000000000
emm12-PSGN-94-BJ-105	12	1994	Beijing	Throat	APSGN	JBJCNN000000000
emm12-PT-94-BJ-132	12	1994	Beijing	Throat	Pharyngeal tonsillitis	JBJCMY000000000
emm12-SF-94-BJ-148	12	1994	Beijing	Throat	Scarlet fever	JBJCMN000000000
emm1-1-PT-05-GZ-E419	1	2005	Guizhou	Throat	Pharyngeal tonsillitis	JBJFSY000000000
G406-1-0	1	2005	Guizhou	NA	NA	JBJFPO000000000
GAS31-M1-SH05	1	2005	Shanghai	NA	NA	JBJFPI000000000
GAS35-SH05	1	2005	Shanghai	NA	NA	JBJFPF000000000
emm12-NA-05-GZ-C14	12	2005	Guizhou	NA	NA	JBJCNP000000000
GAS32-M1-SH06	1	2006	Shanghai	NA	NA	JBJFPH000000000
GAS34-M1-SH06	1	2006	Shanghai	NA	NA	JBJFPG000000000
emm1-19-SF-07-BJ-C17	1	2007	Beijing	Throat	Scarlet fever	JBJFSZ000000000
emm1-22-PAN-07-BJ-M25	1	2007	Beijing	Throat	PANDAS	JBJFSW000000000
emm1-22-SF-07-BJ-D16-2	1	2007	Beijing	Throat	Scarlet fever	JBJFSV000000000
emm1-22-SF-07-BJ-D19	1	2007	Beijing	Throat	Scarlet fever	JBJFSU000000000
emm1-22-SF-07-BJ-D24-1	1	2007	Beijing	Throat	Scarlet fever	JBJFST000000000
emm1-22-SF-07-BJ-D24-2	1	2007	Beijing	Throat	Scarlet fever	JBJFSS000000000
emm1-25-SF-07-BJ-S24	1	2007	Beijing	Throat	Scarlet fever	JBJFSP000000000
emm1-25-SF-07-BJ-SB20	1	2007	Beijing	Throat	Scarlet fever	JBJFSO000000000
emm1-27-SF-07-BJ-D07	1	2007	Beijing	Throat	Scarlet fever	JBJFSN000000000
emm1-6-PT-07-BJ-A89-1	1	2007	Beijing	Throat	Pharyngeal tonsillitis	JBJFSL000000000
emm1-6-PT-07-BJ-A89-2	1	2007	Beijing	Throat	Pharyngeal tonsillitis	JBJFSK000000000
emm1-IMP-07-BJ-Z16-1	1	2007	Beijing	Throat	Impetigo	JBJFSC000000000
emm1-IMP-07-BJ-Z16-2	1	2007	Beijing	Throat	Impetigo	JBJFSB000000000
emm1-IMP-07-BJ-Z20-2	1	2007	Beijing	Skin	Impetigo	JBJFSA000000000
emm1-IMP-07-BJ-Z37-1	1	2007	Beijing	Skin	Impetigo	JBJFRZ000000000
emm1-IMP-07-BJ-Z37-2	1	2007	Beijing	Throat	Impetigo	JBJFRY000000000
emm1-IMP-07-BJ-Z38-1	1	2007	Beijing	External auditory canal secretions	Impetigo	JBJFRX000000000
emm1-IMP-07-BJ-Z38-2	1	2007	Beijing	vulva	Impetigo	JBJFRW000000000
emm1-PT-07-BJ-A120-1	1	2007	Beijing	Throat	Pharyngeal tonsillitis	JBJFRQ000000000
emm1-PT-07-BJ-A120-2	1	2007	Beijing	Throat	Pharyngeal tonsillitis	JBJFRP000000000
emm1-PT-07-BJ-A23	1	2007	Beijing	Throat	Pharyngeal tonsillitis	JBJFRO000000000
emm1-PT-07-BJ-C28	1	2007	Beijing	Throat	Pharyngeal tonsillitis	JBJFRN000000000
emm1-PT-07-BJ-C43-1	1	2007	Beijing	Throat	Pharyngeal tonsillitis	JBJFRM000000000
emm1-PT-07-BJ-C43-2	1	2007	Beijing	Throat	Pharyngeal tonsillitis	JBJFRL000000000
emm1-SF-07-BJ-C13-1	1	2007	Beijing	Throat	Scarlet fever	JBJFQX000000000
emm1-SF-07-BJ-C13-2	1	2007	Beijing	Throat	Scarlet fever	JBJFQW000000000
emm1-SF-07-BJ-C51	1	2007	Beijing	Throat	Scarlet fever	JBJFQV000000000
emm1-SF-07-BJ-D11-1	1	2007	Beijing	Throat	Scarlet fever	JBJFQU000000000
emm1-SF-07-BJ-D11-2	1	2007	Beijing	Throat	Scarlet fever	JBJFQT000000000
emm1-SF-07-BJ-D16-1	1	2007	Beijing	Throat	Scarlet fever	JBJFQS000000000
emm1-SF-07-BJ-Z32-1	1	2007	Beijing	Throat	Scarlet fever	JBJFQR000000000
emm1-SF-07-BJ-Z32-2	1	2007	Beijing	Throat	Scarlet fever	JBJFQQ000000000
Hemm1-2007-B-1-23	1	2007	Beijing	Throat	Health	JBJFPE000000000
Hemm1-2007-B-2-16	1	2007	Beijing	Throat	Health	JBJFPD000000000
Hemm1-2007-C-1-20	1	2007	Beijing	Throat	Health	JBJFPC000000000
emm12-PT-07-SH-001	12	2007	Shanghai	Throat	Pharyngeal tonsillitis	JBJFRK000000000
emm12-22-PAN-07-BJ-M23	12	2007	Beijing	Throat	PANDAS	JBJCOJ000000000
emm12-H-07-CQ-001	12	2007	Chongqing	Throat	Health	JBJCOB000000000
emm12-H-07-CQ-005	12	2007	Chongqing	Throat	Health	JBJCOA000000000
emm12-IMP-07-BJ-Z50	12	2007	Beijing	Skin	Impetigo	JBJCNW000000000
emm12-PT-07-BJ-A39	12	2007	Beijing	Throat	Pharyngeal tonsillitis	JBJCNM000000000
emm12-PT-07-BJ-B33-1	12	2007	Beijing	Throat	Pharyngeal tonsillitis	JBJCNL000000000
emm12-PT-07-BJ-B33-2	12	2007	Beijing	Throat	Pharyngeal tonsillitis	JBJCNK000000000
emm12-PT-07-CQ-004	12	2007	Chongqing	Throat	Pharyngeal tonsillitis	JBJCNJ000000000
emm12-PT-07-CQ-016	12	2007	Chongqing	Throat	Pharyngeal tonsillitis	JBJCNI000000000
emm12-PT-07-CQ-020	12	2007	Chongqing	Throat	Pharyngeal tonsillitis	JBJCNH000000000
emm12-PT-07-SH-001	12	2007	Shanghai	Throat	Pharyngeal tonsillitis	JBJCNG000000000
emm12-SF-07-BJ-C30-1	12	2007	Beijing	Throat	Scarlet fever	JBJCMX000000000
emm12-SF-07-BJ-C30-2	12	2007	Beijing	Throat	Scarlet fever	JBJCMW000000000
emm12-SF-07-BJ-C42-1	12	2007	Beijing	Throat	Scarlet fever	JBJCMV000000000
emm12-SF-07-BJ-C42-2	12	2007	Beijing	Throat	Scarlet fever	JBJCMU000000000
emm12-SF-07-BJ-D57-1	12	2007	Beijing	Throat	Scarlet fever	JBJCMT000000000
emm12-SF-07-BJ-D57-2	12	2007	Beijing	Throat	Scarlet fever	JBJCMS000000000
emm12-SF-07-BJ-Z26-1	12	2007	Beijing	Throat	Scarlet fever	JBJCMR000000000
emm12-SF-07-BJ-Z26-2	12	2007	Beijing	Throat	Scarlet fever	JBJCMQ000000000
Hemm12-2007-A-3-27	12	2007	Beijing	Throat	Health	JBJCLQ000000000
Hemm12-2007-A-4-3	12	2007	Beijing	Throat	Health	JBJCLP000000000
Hemm12-2007-C-1-29	12	2007	Beijing	Throat	Health	JBJCLO000000000
emm1-1-SF-08-SH-102	1	2008	Shanghai	Throat	Scarlet fever	JBJFSX000000000
emm1-24-SF-08-SH-002	1	2008	Shanghai	Throat	Scarlet fever	JBJFSR000000000
emm1-24-SF-08-SH-006	1	2008	Shanghai	Throat	Scarlet fever	JBJFSQ000000000
emm1-2-SF-08-SH-094	1	2008	Shanghai	Throat	Scarlet fever	JBJFSM000000000
emm1-PT-08-SH-021	1	2008	Shanghai	Throat	Pharyngeal tonsillitis	JBJFRI000000000
emm1-PT-08-SH-036	1	2008	Shanghai	Throat	Pharyngeal tonsillitis	JBJFRH000000000
emm1-PT-08-SH-095	1	2008	Shanghai	Throat	Pharyngeal tonsillitis	JBJFRG000000000
emm1-PT-08-SZ-063	1	2008	Shenzhen	Throat	Pharyngeal tonsillitis	JBJFRE000000000
emm1-SF-08-SH-007	1	2008	Shanghai	Throat	Scarlet fever	JBJFQP000000000
emm1-SF-08-SH-013	1	2008	Shanghai	Throat	Scarlet fever	JBJFQO000000000
emm1-SF-08-SH-027	1	2008	Shanghai	Throat	Scarlet fever	JBJFQN000000000
emm1-SF-08-SH-060	1	2008	Shanghai	Throat	Scarlet fever	JBJFQM000000000
GAS23-M1-ShenZ08	1	2008	Shenzhen	NA	NA	JBJFPJ000000000
emm12-PT-08-SH-004	12	2008	Shanghai	Throat	Pharyngeal tonsillitis	JBJFRJ000000000
emm12-PT-08-SZ-060	12	2008	Shenzhen	Throat	Pharyngeal tonsillitis	JBJFRF000000000
emm12-2-SF-08-SH-106	12	2008	Shanghai	Throat	Scarlet fever	JBJCOI000000000
emm12-PT-08-SH-004	12	2008	Shanghai	Throat	Pharyngeal tonsillitis	JBJCNF000000000
emm12-PT-08-SH-032	12	2008	Shanghai	Throat	Pharyngeal tonsillitis	JBJCNE000000000
emm12-PT-08-SZ-059	12	2008	Shenzhen	Throat	Pharyngeal tonsillitis	JBJCND000000000
emm12-PT-08-SZ-060	12	2008	Shenzhen	Throat	Pharyngeal tonsillitis	JBJCNC000000000
emm12-PT-08-SZ-066	12	2008	Shenzhen	Throat	Pharyngeal tonsillitis	JBJCNB000000000
emm12-SF-08-SH-016	12	2008	Shanghai	Throat	Scarlet fever	JBJCMP000000000
emm12-SF-08-SH-017	12	2008	Shanghai	Throat	Scarlet fever	JBJCMO000000000
2011SDJN17	1	2011	Shandong	Throat	Scarlet fever	JBJFYS000000000
2011SDJN20	1	2011	Shandong	Throat	Scarlet fever	JBJFYR000000000
2011SDJN40	1	2011	Shandong	Throat	Scarlet fever	JBJFYQ000000000
2011SDJN48	1	2011	Shandong	Throat	Scarlet fever	JBJFYP000000000
2011SDJN56	1	2011	Shandong	Throat	Scarlet fever	JBJFYO000000000
CY35-2011-M1	1	2011	Beijing	Throat	Scarlet fever	JBJFTG000000000
CY39-2011-M1	1	2011	Beijing	Throat	Streptococcal infection	JBJFTF000000000
FT18-2011-M1	1	2011	Beijing	Throat	Scarlet fever	JBJFPT000000000
2011BJXCGAS01	12	2011	Beijing	Throat	NA	JBJFYT000000000
CP8-2011	12	2011	Beijing	Throat	Tonsillitis	JBJCPB000000000
CY36-2011	12	2011	Beijing	Throat	Scarlet fever	JBJCOY000000000
DC10-2011	12	2011	Beijing	Throat	Scarlet fever	JBJCOV000000000
DC14-2011	12	2011	Beijing	Throat	Pharyngitis	JBJCOU000000000
DC20-2011	12	2011	Beijing	Throat	Scarlet fever	JBJCOT000000000
DC30-2011	12	2011	Beijing	Throat	Pharyngitis	JBJCOS000000000
DX10-2011	12	2011	Beijing	Throat	Scarlet fever	JBJCOR000000000
DX11-2011	12	2011	Beijing	Throat	Scarlet fever	JBJCOQ000000000
FS3-2011	12	2011	Beijing	Throat	Scarlet fever	JBJCMF000000000
HD33-2011	12	2011	Beijing	Throat	Scarlet fever	JBJCLU000000000
JN14-M12	12	2011	Shandong	Throat	Scarlet fever	JBJCLK000000000
JN16-M12	12	2011	Shandong	Throat	Scarlet fever	JBJCLJ000000000
JN1-M12	12	2011	Shandong	Throat	Scarlet fever	JBJCLI000000000
JN23-M12	12	2011	Shandong	Throat	Scarlet fever	JBJCLH000000000
JN28-M12	12	2011	Shandong	Throat	Scarlet fever	JBJCLG000000000
JN2-M12	12	2011	Shandong	Throat	Scarlet fever	JBJCLF000000000
JN30-M12	12	2011	Shandong	Throat	Scarlet fever	JBJCLE000000000
JN31-M12	12	2011	Shandong	Throat	Scarlet fever	JBJCLD000000000
JN34-M12	12	2011	Shandong	Throat	Scarlet fever	JBJCLC000000000
JN38-M12	12	2011	Shandong	Throat	Scarlet fever	JBJCLB000000000
JN39-M12	12	2011	Shandong	Throat	Scarlet fever	JBJCLA000000000
JN41-M12	12	2011	Shandong	Throat	Scarlet fever	JBJCKZ000000000
JN46-M12	12	2011	Shandong	Throat	Scarlet fever	JBJCKY000000000
JN47-M12	12	2011	Shandong	Throat	Scarlet fever	JBJCKX000000000
JN51-M12	12	2011	Shandong	Throat	Scarlet fever	JBJCKW000000000
JN52-M12	12	2011	Shandong	Throat	Scarlet fever	JBJCKV000000000
JN59-M12	12	2011	Shandong	Throat	Scarlet fever	JBJCKU000000000
JN63-M12	12	2011	Shandong	Throat	Scarlet fever	JBJCKT000000000
JN66-M12	12	2011	Shandong	Throat	Scarlet fever	JBJCKS000000000
JN69-M12	12	2011	Shandong	Throat	Scarlet fever	JBJCKR000000000
JN72-M12	12	2011	Shandong	Throat	Scarlet fever	JBJCKQ000000000
JN73-M12	12	2011	Shandong	Throat	Scarlet fever	JBJCKP000000000
JN74-M12	12	2011	Shandong	Throat	Scarlet fever	JBJCKO000000000
JN77-M12	12	2011	Shandong	Throat	Scarlet fever	JBJCKN000000000
JN78-M12	12	2011	Shandong	Throat	Scarlet fever	JBJCKM000000000
JN7-M12	12	2011	Shandong	Throat	Scarlet fever	JBJCKL000000000
JN9-M12	12	2011	Shandong	Throat	Scarlet fever	JBJCKK000000000
SYGAS09	12	2011	Beijing	Throat	Streptococcal infection	JBJCJU000000000
2012HR8-M1	1	2012	Beijing	Throat	Tonsillitis、Pharyngitis	JBJFYN000000000
2012HR9-M1	1	2012	Beijing	Throat	Tonsillitis	JBJFYM000000000
2012SY12-M1	1	2012	Beijing	Throat	Streptococcal infection	JBJFYL000000000
2012SY4-M1	1	2012	Beijing	Throat	Streptococcal infection	JBJFYK000000000
2012SY5-M1	1	2012	Beijing	Throat	Streptococcal infection	JBJFYJ000000000
2012SZ15	1	2012	Jiangsu	Throat	Scarlet fever	JBJFYI000000000
2012SZ26	1	2012	Jiangsu	Throat	Scarlet fever	JBJFYH000000000
2012SZ41	1	2012	Jiangsu	Throat	Scarlet fever	JBJFYG000000000
2012SZ47	1	2012	Jiangsu	Throat	Scarlet fever	JBJFYF000000000
2012SZ48	1	2012	Jiangsu	Throat	Scarlet fever	JBJFYE000000000
2012YQ20-M1	1	2012	Beijing	Throat	NA	JBJFYD000000000
2012YQ26-M1	1	2012	Beijing	Throat	NA	JBJFYC000000000
2012YQ28-M1	1	2012	Beijing	Throat	NA	JBJFYB000000000
FT30-2012-M1	1	2012	Beijing	Throat	Scarlet fever	JBJFPS000000000
FT33-2012-M1	1	2012	Beijing	Throat	Tonsillitis	JBJFPR000000000
HR11-2012-M1	1	2012	Beijing	Throat	Streptococcal infection	JBJFPB000000000
HR4-2012-M1	1	2012	Beijing	Throat	Streptococcal infection	JBJFPA000000000
HR5-2012-M1	1	2012	Beijing	Throat	Streptococcal infection	JBJFOZ000000000
HR7-2012-M1	1	2012	Beijing	Throat	Streptococcal infection	JBJFOY000000000
SY16-2012-M1	1	2012	Beijing	Throat	Streptococcal infection	JBJFOH000000000
SY17-2012-M1	1	2012	Beijing	Throat	Tonsillitis	JBJFOG000000000
XCB33-2012-M1	1	2012	Beijing	Throat	Scarlet fever	JBJCYK000000000
XCN1-2012-M1	1	2012	Beijing	Throat	Scarlet fever	JBJCYI000000000
2012HR10-M12	12	2012	Beijing	Throat	Tonsillitis	JBJCUW000000000
2012MTG4-M12	12	2012	Beijing	Throat	Scarlet fever	JBJCUV000000000
2012MTG-6-M12	12	2012	Beijing	Throat	Scarlet fever	JBJCUU000000000
2012MY1-M12	12	2012	Beijing	Throat	Tonsillitis	JBJCUT000000000
2012SJS18-M12	12	2012	Beijing	Throat	Tonsillitis	JBJCUS000000000
2012SY29-M12	12	2012	Beijing	Throat	Tonsillitis	JBJCUR000000000
2012SY33-M12	12	2012	Beijing	Throat	Tonsillitis	JBJCUQ000000000
2012XC3-M12	12	2012	Beijing	Throat	NA	JBJCUP000000000
2012XC8-M12	12	2012	Beijing	Throat	NA	JBJCUO000000000
2012XCB24-M12	12	2012	Beijing	Throat	Scarlet fever	JBJCUN000000000
2012YQ1-M12	12	2012	Beijing	Throat	NA	JBJCUM000000000
2012YQ21-M12	12	2012	Beijing	Throat	NA	JBJCUL000000000
2012YQDY11-M12	12	2012	Beijing	Throat	NA	JBJCUK000000000
FT12-2012	12	2012	Beijing	Throat	Streptococcal infection	JBJCME000000000
FT3-2012	12	2012	Beijing	Throat	Tonsillitis	JBJCMC000000000
H04-2012	12	2012	Beijing	Throat	NA	JBJCMB000000000
HD15-2012	12	2012	Beijing	Throat	Scarlet fever	JBJCLZ000000000
HD16-2012	12	2012	Beijing	Throat	Streptococcal infection、Tonsillitis	JBJCLY000000000
HD23-2012	12	2012	Beijing	Throat	Scarlet fever	JBJCLX000000000
HD25-2012	12	2012	Beijing	Throat	Scarlet fever	JBJCLW000000000
HD26-2012	12	2012	Beijing	Throat	Scarlet fever	JBJCLV000000000
HD4-2012	12	2012	Beijing	Throat	Scarlet fever	JBJCLT000000000
HD7-2012	12	2012	Beijing	Throat	Streptococcal infection	JBJCLS000000000
HR13-2012	12	2012	Beijing	Throat	Streptococcal infection	JBJCLN000000000
MTG1-2012	12	2012	Beijing	Throat	Scarlet fever	JBJCKH000000000
MTG2-2012	12	2012	Beijing	Throat	Scarlet fever	JBJCKF000000000
MTG3-2012	12	2012	Beijing	Throat	Scarlet fever	JBJCKE000000000
PG21-2012	12	2012	Beijing	Throat	Tonsillitis	JBJCKD000000000
PG23-2012	12	2012	Beijing	Throat	Scarlet fever	JBJCKC000000000
PG24-2012	12	2012	Beijing	Throat	Scarlet fever	JBJCKB000000000
PG25-2012	12	2012	Beijing	Throat	Tonsillitis	JBJCKA000000000
XC4-2012	12	2012	Beijing	Throat	NA	JBJCXG000000000
XC5-2012	12	2012	Beijing	Throat	NA	JBJCXF000000000
XCB27-2012	12	2012	Beijing	Throat	Tonsillitis	JBJCWV000000000
XCB28-2012	12	2012	Beijing	Throat	Streptococcal infection、Pharyngitis	JBJCWU000000000
XCB6-2012	12	2012	Beijing	Throat	Tonsillitis	JBJCWT000000000
YQ5-2012	12	2012	Beijing	Throat	Tonsillitis	JBJCWO000000000
YQ6-2012	12	2012	Beijing	Throat	Tonsillitis	JBJCWN000000000
YQ7-2012	12	2012	Beijing	Throat	Pharyngitis	JBJCWM000000000
YQ8-2012	12	2012	Beijing	Throat	Streptococcal infection	JBJCWL000000000
2013CY0024-M1	1	2013	Beijing	Throat	Scarlet fever	JBJFYA000000000
2013CY009-M1	1	2013	Beijing	Throat	Tonsillitis	JBJFXZ000000000
2013DCB007-M1	1	2013	Beijing	Throat	Scarlet fever	JBJFXY000000000
2013DCN003-M1	1	2013	Beijing	Throat	Scarlet fever	JBJFXX000000000
2013DX006-M1	1	2013	Beijing	Throat	Scarlet fever	JBJFXW000000000
2013DXRB08-M1	1	2013	Beijing	Throat	NA	JBJFXV000000000
2013MTG016-M1	1	2013	Beijing	Throat	Scarlet fever	JBJFXU000000000
2013SYRB025-M1	1	2013	Beijing	Throat	NA	JBJFXT000000000
DX2-2013-M1	1	2013	Beijing	Throat	Scarlet fever	JBJFTB000000000
FT006-2013-M1	1	2013	Beijing	Throat	Tonsillitis	JBJFPV000000000
MTG004-2013-M1	1	2013	Beijing	Throat	Tonsillitis	JBJFOW000000000
MTG007-2013-M1	1	2013	Beijing	Throat	Tonsillitis	JBJFOV000000000
MTG010-2013-M1	1	2013	Beijing	Throat	Tonsillitis	JBJFOU000000000
MTG014-2013-M1	1	2013	Beijing	Throat	Tonsillitis	JBJFOT000000000
MTG17-2013-M1	1	2013	Beijing	Throat	Scarlet fever	JBJFOR000000000
MTG18-2013-M1	1	2013	Beijing	Throat	Scarlet fever	JBJFOQ000000000
MY002-2013-M1	1	2013	Beijing	Throat	Tonsillitis	JBJFON000000000
MY003-2013-M1	1	2013	Beijing	Throat	Tonsillitis	JBJFOM000000000
SY009-2013-M1	1	2013	Beijing	Throat	Tonsillitis	JBJFOI000000000
XCB008-2013-M1	1	2013	Beijing	Throat	Scarlet fever	JBJFNO000000000
SY006-2013-M1	12	2013	Beijing	Throat	Tonsillitis	JBJFOJ000000000
2013CP003-M12	12	2013	Beijing	Throat	Pharyngitis	JBJCUJ000000000
2013CP007-M12	12	2013	Beijing	Throat	Pharyngitis	JBJCUI000000000
2013CP011-M12	12	2013	Beijing	Throat	Scarlet fever	JBJCUH000000000
2013CY015-M12	12	2013	Beijing	Throat	Scarlet fever	JBJCUG000000000
2013CY022-M12	12	2013	Beijing	Throat	Scarlet fever	JBJCUF000000000
2013CY023-M12	12	2013	Beijing	Throat	Scarlet fever	JBJCUE000000000
2013DCN002-M12	12	2013	Beijing	Throat	Scarlet fever	JBJCUD000000000
2013DX8-M12	12	2013	Beijing	Throat	Scarlet fever	JBJCUC000000000
2013SZ10-M12	12	2013	Jiangsu	Throat	Scarlet fever	JBJCUB000000000
2013SZ12-M12	12	2013	Jiangsu	Throat	Scarlet fever	JBJCUA000000000
2013SZ13-M12	12	2013	Jiangsu	Throat	Scarlet fever	JBJCTZ000000000
2013SZ16-M12	12	2013	Jiangsu	Throat	Scarlet fever	JBJCTY000000000
2013SZ17-M12	12	2013	Jiangsu	Throat	Scarlet fever	JBJCTX000000000
2013SZ21-M12	12	2013	Jiangsu	Throat	Scarlet fever	JBJCTW000000000
2013SZ24-M12	12	2013	Jiangsu	Throat	Scarlet fever	JBJCTV000000000
2013SZ28-M12	12	2013	Jiangsu	Throat	Scarlet fever	JBJCTU000000000
2013SZ29-M12	12	2013	Jiangsu	Throat	Scarlet fever	JBJCTT000000000
2013SZ39-M12	12	2013	Jiangsu	Throat	Scarlet fever	JBJCTS000000000
2013SZ40-M12	12	2013	Jiangsu	Throat	Scarlet fever	JBJCTR000000000
2013SZ42-M12	12	2013	Jiangsu	Throat	Scarlet fever	JBJCTQ000000000
2013SZ43-M12	12	2013	Jiangsu	Throat	Scarlet fever	JBJCTP000000000
2013SZ44-M12	12	2013	Jiangsu	Throat	Scarlet fever	JBJCTO000000000
2013SZ45-M12	12	2013	Jiangsu	Throat	Scarlet fever	JBJCTN000000000
2013SZ46-M12	12	2013	Jiangsu	Throat	Scarlet fever	JBJCTM000000000
FS001-2013	12	2013	Beijing	Throat	Scarlet fever	JBJCMI000000000
FS2-2013	12	2013	Beijing	Throat	Scarlet fever	JBJCMG000000000
HD002-2013	12	2013	Beijing	Throat	Scarlet fever	JBJCMA000000000
HD7-2013	12	2013	Beijing	Throat	Tonsillitis	JBJCLR000000000
MTG005-2013	12	2013	Beijing	Throat	Tonsillitis	JBJCKJ000000000
SJS002-2013	12	2013	Beijing	Throat	Scarlet fever	JBJCJZ000000000
XCB007-2013	12	2013	Beijing	Throat	Scarlet fever	JBJCXC000000000
XCB010-2013	12	2013	Beijing	Throat	Scarlet fever	JBJCWZ000000000
XCB013-2013	12	2013	Beijing	Throat	Streptococcal infection	JBJCWY000000000
XCB018-2013	12	2013	Beijing	Throat	Scarlet fever	JBJCWW000000000
XCN001-2013	12	2013	Beijing	Throat	TonsillitisPharyngitis	JBJCWS000000000
XCN4-2013	12	2013	Beijing	Throat	Scarlet fever	JBJCWQ000000000
2014BJCY39	1	2014	Beijing	Throat	Streptococcal infection	JBJFXS000000000
2014CY38-M1	1	2014	Beijing	Throat	Streptococcal infection	JBJFXR000000000
2014CY45-M1	1	2014	Beijing	Throat	NA	JBJFXQ000000000
2014CY46-M1	1	2014	Beijing	Throat	Streptococcal infection	JBJFXP000000000
2014CY47	1	2014	Beijing	Throat	Streptococcal infection	JBJFXO000000000
2014CY48-M1	1	2014	Beijing	Throat	Streptococcal infection	JBJFXN000000000
2014CY53-M1	1	2014	Beijing	Throat	Scarlet fever	JBJFXM000000000
2014CYAY014-M1	1	2014	Beijing	Throat	NA	JBJFXL000000000
2014CYAY032-M1	1	2014	Beijing	Throat	NA	JBJFXK000000000
2014CY-AY-034-M1	1	2014	Beijing	Throat	NA	JBJFXJ000000000
2014CYAY-035-M1	1	2014	Beijing	Throat	NA	JBJFXI000000000
2014CYAY036-M1	1	2014	Beijing	Throat	NA	JBJFXH000000000
2014CYAY10-M1	1	2014	Beijing	Throat	NA	JBJFXG000000000
2014CYAY-11-M1	1	2014	Beijing	Throat	NA	JBJFXF000000000
2014CYAY18-M1	1	2014	Beijing	Throat	NA	JBJFXE000000000
2014CYAY19-M1	1	2014	Beijing	Throat	NA	JBJFXD000000000
STS012-2014-M1	1	2014	Beijing	Throat	NA	JBJFOK000000000
TZ015-2014-M1	1	2014	Beijing	Throat	Scarlet fever	JBJFNS000000000
XCB006-2014-M1	1	2014	Beijing	Throat	Scarlet fever	JBJFNP000000000
XCB010-2014-M1	1	2014	Beijing	Throat	Scarlet fever	JBJFNN000000000
XCB011-2014-M1	1	2014	Beijing	Throat	Scarlet fever	JBJFNM000000000
XCB012-2014-M1	1	2014	Beijing	Throat	Scarlet fever	JBJFNL000000000
XCB020-2014-M1	1	2014	Beijing	Throat	Scarlet fever	JBJFNK000000000
XCB021-2014-M1	1	2014	Beijing	Throat	Scarlet fever	JBJFNJ000000000
XCB025-2014-M1	1	2014	Beijing	Throat	Scarlet fever	JBJCYO000000000
XCB027-2014-M1	1	2014	Beijing	Throat	Scarlet fever	JBJCYN000000000
XCB048-2014-M1	1	2014	Beijing	Throat	Pharyngitis	JBJCYM000000000
XCB049-2014-M1	1	2014	Beijing	Throat	Scarlet fever	JBJCYL000000000
XCN1005-2014-M1	1	2014	Beijing	Throat	NA	JBJCYJ000000000
YQ003-2014-M1	1	2014	Beijing	Throat	Pharyngitis	JBJCYH000000000
YQ005-2014-M1	1	2014	Beijing	Throat	Scarlet fever	JBJCYG000000000
YQ008-2014-M1	1	2014	Beijing	Throat	Scarlet fever	JBJCYF000000000
ZY28-2014-M1	1	2014	Beijing	Throat	NA	JBJCXJ000000000
2014CDAY001-M12	12	2014	Beijing	Throat	NA	JBJCTL000000000
2014CPAY006-M12	12	2014	Beijing	Throat	NA	JBJCTK000000000
2014CY33-M12	12	2014	Beijing	Throat	Streptococcal infection	JBJCTJ000000000
2014CY40-M12	12	2014	Beijing	Throat	Streptococcal infection	JBJCTI000000000
2014CY42-M12	12	2014	Beijing	Throat	Streptococcal infection	JBJCTH000000000
2014CY43-M12	12	2014	Beijing	Throat	Streptococcal infection	JBJCTG000000000
2014CY44-M12	12	2014	Beijing	Throat	Streptococcal infection	JBJCTF000000000
2014CY49-M12	12	2014	Beijing	Throat	NA	JBJCTE000000000
2014CY56-M12	12	2014	Beijing	Throat	Streptococcal infection	JBJCTD000000000
2014CYAY004-M12	12	2014	Beijing	Throat	NA	JBJCTC000000000
2014CYAY009-M12	12	2014	Beijing	Throat	NA	JBJCTB000000000
2014CYAY024-M12	12	2014	Beijing	Throat	NA	JBJCTA000000000
2014CYAY-026-M12	12	2014	Beijing	Throat	NA	JBJCSZ000000000
2014CYAY-15-M12	12	2014	Beijing	Throat	NA	JBJCSY000000000
2014CYS2-M12	12	2014	Beijing	Throat	NA	JBJCSX000000000
2014CYS5-M12	12	2014	Beijing	Throat	NA	JBJCSW000000000
FS010-2014	12	2014	Beijing	Throat	Scarlet fever	JBJCMH000000000
MTG10-2014	12	2014	Beijing	Throat	Scarlet fever	JBJCKI000000000
MTG15-2014	12	2014	Beijing	Throat	Scarlet fever	JBJCKG000000000
STS14-2014	12	2014	Beijing	Throat	NA	JBJCJY000000000
SY011-2014	12	2014	Beijing	Throat	Streptococcal infection	JBJCJX000000000
SY014-2014	12	2014	Beijing	Throat	Streptococcal infection	JBJCJW000000000
WTG19-2014	12	2014	Beijing	Throat	NA	JBJCXH000000000
XCB007-2014	12	2014	Beijing	Throat	Scarlet fever	JBJCXB000000000
XCB009-2014	12	2014	Beijing	Throat	Scarlet fever	JBJCXA000000000
XCB015-2014	12	2014	Beijing	Throat	Scarlet fever	JBJCWX000000000
XCN004-2014	12	2014	Beijing	Throat	Scarlet fever	JBJCWR000000000
XCN9-2014	12	2014	Beijing	Throat	Scarlet fever	JBJCWP000000000
2015CY003-M1	1	2015	Beijing	Throat	Streptococcal infection	JBJFXC000000000
2015CY005-M1	1	2015	Beijing	Throat	Pharyngitis	JBJFXB000000000
2015CY007-M1	1	2015	Beijing	Throat	Pharyngitis	JBJFXA000000000
2015CY017-M1	1	2015	Beijing	Throat	Scarlet fever	JBJFWZ000000000
2015CY018-M1	1	2015	Beijing	Throat	Streptococcal infection	JBJFWY000000000
2015CY021-M1	1	2015	Beijing	Throat	Streptococcal infection	JBJFWX000000000
2015DCB001-M1	1	2015	Beijing	Throat	Scarlet fever	JBJFWW000000000
2015DX002-M1	1	2015	Beijing	Throat	Scarlet fever	JBJFWV000000000
2015DX003-M1	1	2015	Beijing	Throat	Scarlet fever	JBJFWU000000000
2015DX11-M1	1	2015	Beijing	Throat	Scarlet fever	JBJFWT000000000
2015DX16-M1	1	2015	Beijing	Throat	Scarlet fever	JBJFWS000000000
2015DX-19-M1	1	2015	Beijing	Throat	Scarlet fever	JBJFWR000000000
2015FT04-M1	1	2015	Beijing	Throat	Scarlet fever	JBJFWQ000000000
2015HR002-M1	1	2015	Beijing	Throat	Tonsillitis	JBJFWP000000000
2015HR015-M1	1	2015	Beijing	Throat	NA	JBJFWO000000000
2015HR06-M1	1	2015	Beijing	Throat	Streptococcal infection	JBJFWN000000000
2015HR07-M1	1	2015	Beijing	Throat	Tonsillitis	JBJFWM000000000
2015HR12-M1	1	2015	Beijing	Throat	Tonsillitis	JBJFWL000000000
2015CP003-M12	12	2015	Beijing	Throat	Tonsillitis	JBJCSV000000000
2015CP004-M12	12	2015	Beijing	Throat	Tonsillitis	JBJCSU000000000
2015CY001-M12	12	2015	Beijing	Throat	Streptococcal infection	JBJCST000000000
2015CY009-M12	12	2015	Beijing	Throat	Scarlet fever	JBJCSS000000000
2015CY011-M12	12	2015	Beijing	Throat	Streptococcal infection	JBJCSR000000000
2015CY024-M12	12	2015	Beijing	Throat	Streptococcal infection	JBJCSQ000000000
2015CY025-M12	12	2015	Beijing	Throat	Streptococcal infection	JBJCSP000000000
2015CY026-M12	12	2015	Beijing	Throat	Scarlet fever	JBJCSO000000000
2015DC-001-M12	12	2015	Beijing	Throat	NA	JBJCSN000000000
2015DC-08-M12	12	2015	Beijing	Throat	NA	JBJCSM000000000
2015DK004-M12	12	2015	Beijing	Throat	NA	JBJCSL000000000
2015DX001-M12	12	2015	Beijing	Throat	Scarlet fever	JBJCSK000000000
2015DX005-M12	12	2015	Beijing	Throat	Scarlet fever	JBJCSJ000000000
2015DX007-M12	12	2015	Beijing	Throat	Tonsillitis	JBJCSI000000000
2015DX08-M12	12	2015	Beijing	Throat	Scarlet fever	JBJCSH000000000
2015DX-09-M12	12	2015	Beijing	Throat	Scarlet fever	JBJCSG000000000
2015DX-10-M12	12	2015	Beijing	Throat	Scarlet fever	JBJCSF000000000
2015DX-17-M12	12	2015	Beijing	Throat	Tonsillitis	JBJCSE000000000
2015DX-18-M12	12	2015	Beijing	Throat	Scarlet fever	JBJCSD000000000
2015F3-3-M12	12	2015	Beijing	Throat	NA	JBJCSC000000000
2015FT-02-M12	12	2015	Beijing	Throat	Tonsillitis	JBJCSB000000000
2015HD-10-M12	12	2015	Beijing	Throat	Scarlet fever	JBJCSA000000000
2015HD12-M12	12	2015	Beijing	Throat	Scarlet fever	JBJCRZ000000000
2015MY02-M12	12	2015	Beijing	Throat	Scarlet fever	JBJCRY000000000
2015SJS003-M12	12	2015	Beijing	Throat	Scarlet fever	JBJCRX000000000
2015SJS005-M12	12	2015	Beijing	Throat	Scarlet fever	JBJCRW000000000
2015SJS01-M12	12	2015	Beijing	Throat	Tonsillitis	JBJCRV000000000
2015SJS02-M12	12	2015	Beijing	Throat	Scarlet fever	JBJCRU000000000
2015SJS08-M12	12	2015	Beijing	Throat	Scarlet fever	JBJCRT000000000
2015SY005-M12	12	2015	Beijing	Throat	Streptococcal infection	JBJCRS000000000
2015SY013-M12	12	2015	Beijing	Throat	Tonsillitis	JBJCRR000000000
2015TZ006-M12	12	2015	Beijing	Throat	Scarlet fever	JBJCRQ000000000
2016BJDX9	1	2016	Beijing	Throat	Pharyngitis	JBJFWK000000000
2016CD2-M1	1	2016	Beijing	Throat	NA	JBJFWJ000000000
2016CDCY8-M1	1	2016	Beijing	Throat	Streptococcal infection	JBJFWI000000000
2016CDFS3-M1	1	2016	Beijing	Throat	Scarlet fever	JBJFWH000000000
2016CDHD1-M1	1	2016	Beijing	Throat	Scarlet fever	JBJFWG000000000
2016CDHD2-M1	1	2016	Beijing	Throat	Tonsillitis	JBJFWF000000000
2016CDHD7-M1	1	2016	Beijing	Throat	Scarlet fever	JBJFWE000000000
2016CDHD8-M1	1	2016	Beijing	Throat	Tonsillitis	JBJFWD000000000
2016CDHD9-M1	1	2016	Beijing	Throat	Scarlet fever	JBJFWC000000000
2016CDHR6-M1	1	2016	Beijing	Throat	Pharyngitis	JBJFWB000000000
2016CDXC10-M1	1	2016	Beijing	Throat	Scarlet fever	JBJFWA000000000
2016CDXC12-M1	1	2016	Beijing	Throat	Scarlet fever	JBJFVZ000000000
2016CDXC3-M1	1	2016	Beijing	Throat	Tonsillitis	JBJFVY000000000
2016CP11-M1	1	2016	Beijing	Throat	Pharyngitis	JBJFVX000000000
2016CP1-M1	1	2016	Beijing	Throat	Scarlet fever	JBJFVW000000000
2016DC3-M1	1	2016	Beijing	Throat	Streptococcal infection	JBJFVV000000000
2016FDP3-M1	1	2016	Beijing	Throat	NA	JBJFVU000000000
2016FS6-M1	1	2016	Beijing	Throat	Scarlet fever	JBJFVT000000000
2016FT12-M1	1	2016	Beijing	Throat	Tonsillitis	JBJFVS000000000
2016FT13-M1	1	2016	Beijing	Throat	Tonsillitis	JBJFVR000000000
2016HD12-M1	1	2016	Beijing	Throat	Scarlet fever	JBJFVQ000000000
2016HD18-M1	1	2016	Beijing	Throat	Scarlet fever	JBJFVP000000000
2016HR10-M1	1	2016	Beijing	Throat	Tonsillitis	JBJFVO000000000
2016XC06-M1	1	2016	Beijing	Throat	Scarlet fever	JBJFVN000000000
2016XC08-M1	1	2016	Beijing	Throat	Scarlet fever	JBJFVM000000000
2016XC17-M1	1	2016	Beijing	Throat	Scarlet fever	JBJFVL000000000
2016XC18-M1	1	2016	Beijing	Throat	Scarlet fever	JBJFVK000000000
2016XC20-M1	1	2016	Beijing	Throat	Scarlet fever	JBJFVJ000000000
2016YQ2-M1	1	2016	Beijing	Throat	Tonsillitis	JBJFVI000000000
emm1-HSP-16-SZ-249	1	2016	Shenzhen	Throat	Henoch-Schonlein purpura	JBJFSF000000000
emm1-IMP-16-SZ-795	1	2016	Shenzhen	Throat	Impetigo	JBJFRV000000000
emm1-PT-16-SZ-250	1	2016	Shenzhen	Throat	Pharyngeal tonsillitis	JBJFRD000000000
emm1-STI-16-SZ-258	1	2016	Shenzhen	Pus	Soft tissue infection	JBJFQI000000000
2016CDCY1-M12	12	2016	Beijing	Throat	Scarlet fever	JBJCRP000000000
2016CDCY-9-M12	12	2016	Beijing	Throat	Streptococcal infection	JBJCRO000000000
2016CDFS2-M12	12	2016	Beijing	Throat	Scarlet fever	JBJCRN000000000
2016CDFS4-M12	12	2016	Beijing	Throat	Scarlet fever	JBJCRM000000000
2016CDFT1-M12	12	2016	Beijing	Throat	Scarlet fever	JBJCRL000000000
2016CDFT3-M12	12	2016	Beijing	Throat	Scarlet fever	JBJCRK000000000
2016CDMTG1-M12	12	2016	Beijing	Throat	NA	JBJCRJ000000000
2016CDPG1-M12	12	2016	Beijing	Throat	Scarlet fever	JBJCRI000000000
2016CDXC13-M12	12	2016	Beijing	Throat	Scarlet fever	JBJCRH000000000
2016CDXC2-M12	12	2016	Beijing	Throat	Scarlet fever	JBJCRG000000000
2016CDYQ1-M12	12	2016	Beijing	Throat	Scarlet fever	JBJCRF000000000
2016CY14-M12	12	2016	Beijing	Throat	Streptococcal infection	JBJCRE000000000
2016CY15-M12	12	2016	Beijing	Throat	Streptococcal infection	JBJCRD000000000
2016CY34-M12	12	2016	Beijing	Throat	Scarlet fever	JBJCRC000000000
2016FS7-M12	12	2016	Beijing	Throat	Scarlet fever	JBJCRB000000000
2016FT9-M12	12	2016	Beijing	Throat	Tonsillitis	JBJCRA000000000
2016HD10-M12	12	2016	Beijing	Throat	Scarlet fever	JBJCQZ000000000
2016HR9-M12	12	2016	Beijing	Throat	Scarlet fever	JBJCQY000000000
2016MY5-M12	12	2016	Beijing	Throat	Scarlet fever	JBJCQX000000000
2016TZ10-M12	12	2016	Beijing	Throat	Scarlet fever	JBJCQW000000000
2016XC14-M12	12	2016	Beijing	Throat	Scarlet fever	JBJCQV000000000
2016XC16-M12	12	2016	Beijing	Throat	Scarlet fever	JBJCQU000000000
2016XC19-M12	12	2016	Beijing	Throat	Scarlet fever	JBJCQT000000000
emm12-19-HSP-16-SZ-245	12	2016	Shenzhen	Throat	Henoch-Schonlein purpura	JBJCON000000000
emm12-ART-16-SZ-244	12	2016	Shenzhen	Pus	Arthritis	JBJCOC000000000
emm12-IMP-16-SZ-854	12	2016	Shenzhen	Throat	Scarlet fever	JBJCNV000000000
emm12-IMP-16-SZ-892	12	2016	Shenzhen	Throat	impetigo	JBJCNU000000000
emm12-Syn-16-SZ-257	12	2016	Shenzhen	Pus	Synovitis	JBJCMK000000000
CY40-2017-M1	1	2017	Beijing	Throat	Streptococcal infection	JBJFTE000000000
CY43-2017-M1	1	2017	Beijing	Throat	Streptococcal infection	JBJFTD000000000
DX15-2017-M1	1	2017	Beijing	Throat	Scarlet fever	JBJFTC000000000
emm1-19-HSP-17-SZ-1436	1	2017	Shenzhen	Throat	Henoch-Schonlein purpura	JBJFTA000000000
emm1-HSP-17-SZ-352	1	2017	Shenzhen	Throat	Henoch-Schonlein purpura	JBJFSE000000000
emm1-PT-17-SZ-345	1	2017	Shenzhen	Throat	Pharyngeal tonsillitis	JBJFRC000000000
emm1-PT-17-SZ-349	1	2017	Shenzhen	Sputum	Pharyngeal tonsillitis	JBJFRB000000000
emm1-STI-17-SZ-284	1	2017	Shenzhen	Throat	Soft tissue infection	JBJFQH000000000
emm1-STI-17-SZ-294	1	2017	Shenzhen	Foot secretions	Soft tissue infection	JBJFQG000000000
emm1-STI-17-SZ-301	1	2017	Shenzhen	Pus	Soft tissue infection	JBJFQF000000000
FS05-2017-M1	1	2017	Beijing	Throat	NA	JBJFQA000000000
FS2-2017-M1	1	2017	Beijing	Throat	Scarlet fever	JBJFPZ000000000
FS4-2017-M1	1	2017	Beijing	Throat	Tonsillitis	JBJFPY000000000
FS6-2017-M1	1	2017	Beijing	Throat	Scarlet fever	JBJFPX000000000
FS8-2017-M1	1	2017	Beijing	Throat	Scarlet fever	JBJFPW000000000
FT17-2017-M1	1	2017	Beijing	Throat	Tonsillitis	JBJFPU000000000
FT8-2017-M1	1	2017	Beijing	Throat	Scarlet fever	JBJFPQ000000000
FZ07-2017-M1	1	2017	Beijing	Throat	NA	JBJFPP000000000
HR9-2017-M1	1	2017	Beijing	Throat	Streptococcal infection	JBJFOX000000000
MTG1-2017-M1	1	2017	Beijing	Throat	Streptococcal infection	JBJFOS000000000
MTG2-2017-M1	1	2017	Beijing	Throat	Scarlet fever	JBJFOP000000000
MTG3-2017-M1	1	2017	Beijing	Throat	Scarlet fever	JBJFOO000000000
PG23-2017-M1	1	2017	Beijing	Throat	Tonsillitis	JBJFOL000000000
SY47-2017-M1	1	2017	Beijing	Throat	Scarlet fever	JBJFOF000000000
SY48-2017-M1	1	2017	Beijing	Throat	Streptococcal infection	JBJFOE000000000
TZ21-2017-M1	1	2017	Beijing	Throat	Scarlet fever	JBJFNR000000000
XC19-2017-M1	1	2017	Beijing	Throat	NA	JBJFNQ000000000
emm12-IMP-17-SZ-1068	12	2017	Shenzhen	Throat	Impetigo	JBJFRU000000000
A1710025-M12	12	2017	Shandong	NA	NA	JBJCPL000000000
CD-CP13-2017-M12	12	2017	Beijing	Throat	Tonsillitis	JBJCPD000000000
CP15-2017	12	2017	Beijing	Throat	Pharyngitis	JBJCPC000000000
CY20-2017	12	2017	Beijing	Throat	Streptococcal infection	JBJCPA000000000
CY28-2017	12	2017	Beijing	Throat	Streptococcal infection	JBJCOZ000000000
CY39-2017	12	2017	Beijing	Throat	NA	JBJCOX000000000
CY42-2017	12	2017	Beijing	Throat	Streptococcal infection	JBJCOW000000000
DX12-2017	12	2017	Beijing	Throat	Scarlet fever	JBJCOP000000000
DX14-2017	12	2017	Beijing	Throat	Tonsillitis	JBJCOO000000000
emm12-19-HSP-17-SZ-288	12	2017	Shenzhen	Sputum	Henoch-Schonlein purpura	JBJCOM000000000
emm12-19-IMP-17-SZ-1462	12	2017	Shenzhen	Throat	impetigo	JBJCOL000000000
emm12-37-PT-17-SZ-1107	12	2017	Shenzhen	Throat	Pharyngeal tonsillitis	JBJCOH000000000
emm12-93-IMP-17-SZ-1113	12	2017	Shenzhen	Throat	Impetigo	JBJCOF000000000
emm12-HSP-17-SZ-290	12	2017	Shenzhen	Throat	Henoch-Schonlein purpura	JBJCNZ000000000
emm12-HSP-17-SZ-331	12	2017	Shenzhen	Throat	Henoch-Schonlein purpura	JBJCNY000000000
emm12-HSP-17-SZ-361	12	2017	Shenzhen	Sputum	Henoch-Schonlein purpura	JBJCNX000000000
emm12-IMP-17-SZ-1068	12	2017	Shenzhen	Throat	impetigo	JBJCNT000000000
emm12-IMP-17-SZ-1527	12	2017	Shenzhen	Throat	impetigo	JBJCNS000000000
emm12-IMP-17-SZ-962	12	2017	Shenzhen	Throat	impetigo	JBJCNR000000000
emm12-STI-17-SZ-292	12	2017	Shenzhen	Pus	Soft tissue infection	JBJCMM000000000
emm12-TYM-17-SZ-275	12	2017	Shenzhen	External auditory canal secretions	tympanitis	JBJCMJ000000000
FT16-2017	12	2017	Beijing	Throat	Tonsillitis	JBJCMD000000000
HR13-2017	12	2017	Beijing	Throat	Tonsillitis、Pharyngitis	JBJCLM000000000
HR14-2017	12	2017	Beijing	Throat	Streptococcal infection	JBJCLL000000000
SY13-2017	12	2017	Beijing	Throat	Pharyngeal tonsillitis	JBJCJV000000000
TZ33-2017	12	2017	Beijing	Throat	Streptococcal infection	JBJCJN000000000
TZ36-2017	12	2017	Beijing	Throat	Streptococcal infection	JBJCXI000000000
XC8-2017	12	2017	Beijing	Throat	Tonsillitis	JBJCXE000000000
XC9-2017	12	2017	Beijing	Throat	Scarlet fever	JBJCXD000000000
YQ8-2017	12	2017	Beijing	Throat	Scarlet fever	JBJCWK000000000
ZJ2349-M12	12	2017	Zhejiang	Throat	NA	JBJCVP000000000
ZJ2358-M12	12	2017	Zhejiang	Pus	NA	JBJCVO000000000
ZJ2373-M12	12	2017	Zhejiang	Vagin	NA	JBJCVN000000000
ZJ2374-M12	12	2017	Zhejiang	Throat	NA	JBJCVM000000000
2018BJFT11	1	2018	Beijing	Throat	Scarlet fever	JBJFVH000000000
2018BJFT17	1	2018	Beijing	Throat	Scarlet fever	JBJFVG000000000
2018CP5-M1	1	2018	Beijing	Throat	NA	JBJFVF000000000
2018DX1-M1	1	2018	Beijing	Throat	Scarlet fever	JBJFVE000000000
2018DX2-M1	1	2018	Beijing	Throat	Scarlet fever	JBJFVD000000000
2018DX3-M1	1	2018	Beijing	Throat	Pharyngitis	JBJFVC000000000
2018DX4	1	2018	Beijing	Throat	NA	JBJFVB000000000
2018FT-10-M1	1	2018	Beijing	Throat	Pharyngitis	JBJFVA000000000
2018FT-12-M1	1	2018	Beijing	Throat	Pharyngitis	JBJFUZ000000000
2018FT14-M1	1	2018	Beijing	Throat	Pharyngitis	JBJFUY000000000
2018FT-15-M1	1	2018	Beijing	Throat	Pharyngitis	JBJFUX000000000
2018FT-16-M1	1	2018	Beijing	Throat	Pharyngitis	JBJFUW000000000
2018FT-3-M1	1	2018	Beijing	Throat	Pharyngitis	JBJFUV000000000
2018FT-4-M1	1	2018	Beijing	Throat	Pharyngitis	JBJFUU000000000
2018FT-6-M1	1	2018	Beijing	Throat	Pharyngitis	JBJFUT000000000
2018FT-7-M1	1	2018	Beijing	Throat	Pharyngitis	JBJFUS000000000
2018FT-8-M1	1	2018	Beijing	Throat	NA	JBJFUR000000000
2018FT-9-M1	1	2018	Beijing	Throat	Pharyngitis	JBJFUQ000000000
2018SY-18-M1	1	2018	Beijing	Throat	Pharyngitis	JBJFUP000000000
2018SY19-M1	1	2018	Beijing	Throat	Pharyngitis	JBJFUO000000000
2018SY21-M1	1	2018	Beijing	Throat	Pharyngitis	JBJFUN000000000
2018SY22-M1	1	2018	Beijing	Throat	Pharyngitis	JBJFUM000000000
2018SY31-M1	1	2018	Beijing	Throat	Pharyngitis	JBJFUL000000000
2018SY-3-M1	1	2018	Beijing	Throat	Pharyngitis	JBJFUK000000000
2018SY-6-M1	1	2018	Beijing	Throat	Pharyngitis	JBJFUJ000000000
2018TZ39-M1	1	2018	Beijing	Throat	Scarlet fever	JBJFUI000000000
emm1-Abs-18-SZ-421	1	2018	Shenzhen	Pus	Abscess	JBJFSJ000000000
emm1-ART-18-SZ-407	1	2018	Shenzhen	Hip joint drainage fluid	Arthritis	JBJFSI000000000
emm1-ART-18-SZ-408	1	2018	Shenzhen	Pus	Arthritis	JBJFSH000000000
emm1-ART-18-SZ-411	1	2018	Shenzhen	Blood	Arthritis	JBJFSG000000000
emm1-HSP-18-SZ-402	1	2018	Shenzhen	Urine	Henoch-Schonlein purpura	JBJFSD000000000
ZJ2378-M1	1	2018	Zhejiang	Hydrothorax	NA	JBJCXQ000000000
ZJ2385-M1	1	2018	Zhejiang	Throat	NA	JBJCXP000000000
ZJ2432-M1	1	2018	Zhejiang	Sputum	NA	JBJCXO000000000
2018CP-1-M12	12	2018	Beijing	Throat	NA	JBJCQS000000000
2018CP28-M12	12	2018	Beijing	Throat	NA	JBJCQR000000000
2018CP2-M12	12	2018	Beijing	Throat	NA	JBJCQQ000000000
2018CP4-M12	12	2018	Beijing	Throat	NA	JBJCQP000000000
2018F3-23-M12	12	2018	Beijing	Throat	NA	JBJCQO000000000
2018FT-2-M12	12	2018	Beijing	Throat	Pharyngitis	JBJCQN000000000
2018SJS3-M12	12	2018	Beijing	Throat	Scarlet fever	JBJCQM000000000
2018SY10-M12	12	2018	Beijing	Throat	Pharyngitis	JBJCQL000000000
2018SY-1-M12	12	2018	Beijing	Throat	Pharyngitis	JBJCQK000000000
2018SY23-M12	12	2018	Beijing	Throat	NA	JBJCQJ000000000
2018SY24-M12	12	2018	Beijing	Throat	NA	JBJCQI000000000
2018SY25-M12	12	2018	Beijing	Throat	NA	JBJCQH000000000
2018SY26-M12	12	2018	Beijing	Throat	NA	JBJCQG000000000
2018SY-2-M12	12	2018	Beijing	Throat	Pharyngitis	JBJCQF000000000
2018SY32-M12	12	2018	Beijing	Throat	Pharyngitis	JBJCQE000000000
2018TZ41-M12	12	2018	Beijing	Throat	Pharyngitis	JBJCQD000000000
A1816019-M12	12	2018	Shandong	NA	NA	JBJCPK000000000
BJSY2018XHR057-M12	12	2018	Beijing	Throat	NA	JBJCPF000000000
BJSY2018XHR65-M12	12	2018	Beijing	Throat	NA	JBJCPE000000000
emm12-21-VAG-18-SZ-404	12	2018	Shenzhen	Vaginal secretions	vaginitis	JBJCOK000000000
emm12-37-PT-18-SZ-422	12	2018	Shenzhen	Throat	Pharyngeal tonsillitis	JBJCOG000000000
emm12-95-HSP-18-SZ-393	12	2018	Shenzhen	Pus	Sepsis	JBJCOE000000000
emm12-95-HSP-18-SZ-394	12	2018	Shenzhen	Pus	Sepsis	JBJCOD000000000
emm12-STI-18-SZ-419	12	2018	Shenzhen	Knee joint puncture fluid	Soft tissue infection	JBJCML000000000
ZJ2384-M12	12	2018	Zhejiang	Throat	NA	JBJCVL000000000
ZJ2389-M12	12	2018	Zhejiang	Pus	NA	JBJCVK000000000
ZJ2404-M12	12	2018	Zhejiang	Sputum	NA	JBJCVJ000000000
ZJ2413-M12	12	2018	Zhejiang	Throat	NA	JBJCVI000000000
ZJ2503-M12	12	2018	Zhejiang	Pus	NA	JBJCVH000000000
ZJ2967-M12	12	2018	Zhejiang	Throat	NA	JBJCVG000000000
ZJ2992-M12	12	2018	Zhejiang	Throat	NA	JBJCVF000000000
2019BJCY11	1	2019	Beijing	Throat	Streptococcal infection	JBJFUH000000000
2019BJCY14	1	2019	Beijing	Throat	Streptococcal infection	JBJFUG000000000
2019BJCY4	1	2019	Beijing	Throat	Streptococcal infection	JBJFUF000000000
2019BJCY6	1	2019	Beijing	Throat	Streptococcal infection	JBJFUE000000000
2019BJDC2	1	2019	Beijing	Throat	Tonsillitis、Pharyngitis	JBJFUD000000000
2019BJDC3	1	2019	Beijing	Throat	Scarlet fever	JBJFUC000000000
2019BJDC5	1	2019	Beijing	Throat	Tonsillitis、Pharyngitis	JBJFUB000000000
2019BJDX3	1	2019	Beijing	Throat	Scarlet fever	JBJFUA000000000
2019BJDX5	1	2019	Beijing	Throat	Scarlet fever	JBJFTZ000000000
2019BJFT1	1	2019	Beijing	Throat	Tonsillitis	JBJFTY000000000
2019BJHD1	1	2019	Beijing	Throat	Tonsillitis	JBJFTX000000000
2019BJHD4	1	2019	Beijing	Throat	Streptococcal infection	JBJFTW000000000
2019BJHR1	1	2019	Beijing	Throat	Tonsillitis	JBJFTV000000000
2019BJHR3	1	2019	Beijing	Throat	Tonsillitis	JBJFTU000000000
2019BJHR5	1	2019	Beijing	Throat	Pharyngitis	JBJFTT000000000
2019BJMTG3	1	2019	Beijing	Throat	Scarlet fever	JBJFTS000000000
2019BJMTG9	1	2019	Beijing	Throat	Streptococcal infection	JBJFTR000000000
2019BJPG5	1	2019	Beijing	Throat	Tonsillitis、Pharyngitis	JBJFTQ000000000
2019BJXC8	1	2019	Beijing	Throat	NA	JBJFTP000000000
2019HLJ_HPQ-M1	1	2019	Heilongjiang	Throat	Scarlet fever	JBJFTO000000000
2019HLJ_LXB-M1	1	2019	Heilongjiang	Throat	Scarlet fever	JBJFTN000000000
2019HLJ_ZMR-M1	1	2019	Heilongjiang	Throat	Scarlet fever	JBJFTM000000000
2019HLJ_ZWB-M1	1	2019	Heilongjiang	Throat	Scarlet fever	JBJFTL000000000
2019HLJ_ZXT-M1	1	2019	Heilongjiang	Throat	Scarlet fever	JBJFTK000000000
A1911012-M1	1	2019	Shandong	NA	NA	JBJFTI000000000
A1911601-M1	1	2019	Shandong	NA	NA	JBJFTH000000000
SZ201901	1	2019	Jiangsu	Throat	Scarlet fever	JBJFOD000000000
SZ201903	1	2019	Jiangsu	Throat	Scarlet fever	JBJFOC000000000
SZ201905	1	2019	Jiangsu	Throat	Scarlet fever	JBJFOB000000000
SZ201910	1	2019	Jiangsu	Throat	Scarlet fever	JBJFOA000000000
SZ201912	1	2019	Jiangsu	Throat	Scarlet fever	JBJFNZ000000000
SZ201913	1	2019	Jiangsu	Throat	Scarlet fever	JBJFNY000000000
SZ201915	1	2019	Jiangsu	Throat	Scarlet fever	JBJFNX000000000
SZ201916	1	2019	Jiangsu	Throat	Scarlet fever	JBJFNW000000000
SZ201919	1	2019	Jiangsu	Throat	Scarlet fever	JBJFNV000000000
SZ201928	1	2019	Jiangsu	Throat	Scarlet fever	JBJFNU000000000
SZ201936	1	2019	Jiangsu	Throat	Scarlet fever	JBJFNT000000000
ZJ19SPY7014-M1	1	2019	Zhejiang	Throat	NA	JBJCYE000000000
ZJ19spy7043-M1	1	2019	Zhejiang	Sputum	NA	JBJCYD000000000
ZJ19spy7044-M1	1	2019	Zhejiang	Pus	NA	JBJCYC000000000
ZJ19SPY7052-M1	1	2019	Zhejiang	Vagin	NA	JBJCYB000000000
ZJ19SPY7060-M1	1	2019	Zhejiang	Pus	NA	JBJCYA000000000
ZJ19spy7064-M1	1	2019	Zhejiang	Vaginal secretions	NA	JBJCXZ000000000
ZJ19SPY7070-M1	1	2019	Zhejiang	Vagin	NA	JBJCXY000000000
ZJ19spy7071-M1	1	2019	Zhejiang	Vaginal secretions	NA	JBJCXX000000000
ZJ3211-M1	1	2019	Zhejiang	Throat	NA	JBJCXN000000000
ZJ7051-M1	1	2019	Zhejiang	Vaginal secretions	NA	JBJCXL000000000
ZJ7063-M1	1	2019	Zhejiang	Vaginal secretions	NA	JBJCXK000000000
2019CY18-M12	12	2019	Beijing	Throat	Streptococcal infection	JBJCQC000000000
2019CY8-M12	12	2019	Beijing	Throat	Streptococcal infection	JBJCQB000000000
2019DX14-M12	12	2019	Beijing	Throat	Scarlet fever	JBJCQA000000000
2019DX7-M12	12	2019	Beijing	Throat	Scarlet fever	JBJCPZ000000000
2019FS1-M12	12	2019	Beijing	Throat	Scarlet fever	JBJCPY000000000
2019HD10-M12	12	2019	Beijing	Throat	Tonsillitis、Pharyngitis	JBJCPX000000000
2019HD8-M12	12	2019	Beijing	Throat	Streptococcal infection	JBJCPW000000000
2019HLJLYZ-M12	12	2019	Heilongjiang	Throat	Scarlet fever	JBJCPV000000000
2019HLJZZT-M12	12	2019	Heilongjiang	Throat	Scarlet fever	JBJCPU000000000
2019SY1-M12	12	2019	Beijing	Throat	Tonsillitis	JBJCPT000000000
2019SY3-M12	12	2019	Beijing	Throat	Tonsillitis、Pharyngitis	JBJCPS000000000
2019SY5-M12	12	2019	Beijing	Throat	Streptococcal infection	JBJCPR000000000
2019SY6-M12	12	2019	Beijing	Throat	Streptococcal infection	JBJCPQ000000000
2019TZ6-M12	12	2019	Beijing	Throat	Tonsillitis	JBJCPP000000000
2019TZ9-M12	12	2019	Beijing	Throat	Scarlet fever	JBJCPO000000000
2019XC3-M12	12	2019	Beijing	Throat	NA	JBJCPN000000000
2019XC5-M12	12	2019	Beijing	Throat	NA	JBJCPM000000000
A190099-M12	12	2019	Shandong	NA	NA	JBJCPJ000000000
A1911010-M12	12	2019	Shandong	NA	NA	JBJCPI000000000
A1911065-M12	12	2019	Shandong	NA	NA	JBJCPH000000000
A1911071-M12	12	2019	Shandong	NA	NA	JBJCPG000000000
SZ201907-M12	12	2019	Jiangsu	Throat	Scarlet fever	JBJCJT000000000
SZ201908-M12	12	2019	Jiangsu	Throat	Scarlet fever	JBJCJS000000000
SZ201911-M12	12	2019	Jiangsu	Throat	Scarlet fever	JBJCJR000000000
SZ201918-M12	12	2019	Jiangsu	Throat	Scarlet fever	JBJCJQ000000000
SZ201921-M12	12	2019	Jiangsu	Throat	Scarlet fever	JBJCJP000000000
SZ201923-M12	12	2019	Jiangsu	Throat	Scarlet fever	JBJCJO000000000
ZJ19SPY7003-M12	12	2019	Zhejiang	Lavage fluid	NA	JBJCWJ000000000
ZJ19SPY7015-M12	12	2019	Zhejiang	Throat	NA	JBJCWI000000000
ZJ19SPY7025-M12	12	2019	Zhejiang	Throat	NA	JBJCWH000000000
ZJ19SPY7030-M12	12	2019	Zhejiang	Pus	NA	JBJCWG000000000
ZJ19SPY7042-M12	12	2019	Zhejiang	Throat	NA	JBJCWF000000000
ZJ19SPY7054-M12	12	2019	Zhejiang	Throat	NA	JBJCWE000000000
ZJ19spy7055-M12	12	2019	Zhejiang	Vaginal secretions	NA	JBJCWD000000000
ZJ19spy7056-M12	12	2019	Zhejiang	Vaginal secretions	NA	JBJCWC000000000
ZJ19spy7059-M12	12	2019	Zhejiang	Vaginal secretions	NA	JBJCWB000000000
ZJ19spy7061-M12	12	2019	Zhejiang	Vaginal secretions	NA	JBJCWA000000000
ZJ19spy7067-M12	12	2019	Zhejiang	Vaginal secretions	NA	JBJCVZ000000000
ZJ19SPY7068-M12	12	2019	Zhejiang	Vagin	NA	JBJCVY000000000
ZJ19spy7069-M12	12	2019	Zhejiang	Vagin	NA	JBJCVX000000000
ZJ19spy7075-M12	12	2019	Zhejiang	NA	NA	JBJCVW000000000
ZJ3023-M12	12	2019	Zhejiang	Throat	NA	JBJCVE000000000
ZJ3043-M12	12	2019	Zhejiang	Sputum	NA	JBJCVD000000000
ZJ3044-M12	12	2019	Zhejiang	Sputum	NA	JBJCVC000000000
ZJ3081-M12	12	2019	Zhejiang	Throat	NA	JBJCVB000000000
ZJ20SPY7001-M1	1	2020	Zhejiang	Vagin	NA	JBJCXW000000000
ZJ20spy7003-M1	1	2020	Zhejiang	Lavage fluid	NA	JBJCXV000000000
ZJ20spy7005-M1	1	2020	Zhejiang	Vagin	NA	JBJCXU000000000
ZJ20spy7006-M1	1	2020	Zhejiang	Vaginal secretions	NA	JBJCXT000000000
ZJ20spy7011-M1	1	2020	Zhejiang	Vaginal secretions	NA	JBJCXS000000000
ZJ20SPY7013-M1	1	2020	Zhejiang	Throat	NA	JBJCXR000000000
ZJ7008-M1	1	2020	Zhejiang	Vaginal secretions	NA	JBJCXM000000000
ZJ20spy7002-M12	12	2020	Zhejiang	Lavage fluid	NA	JBJCVV000000000
ZJ20spy7004-M12	12	2020	Zhejiang	Vaginal secretions	NA	JBJCVU000000000
ZJ20spy7007-M12	12	2020	Zhejiang	Vaginal secretions	NA	JBJCVT000000000
ZJ20spy7010-M12	12	2020	Zhejiang	Vaginal secretions	NA	JBJCVS000000000
ZJ20spy7017-M12	12	2020	Zhejiang	Throat	NA	JBJCVR000000000
ZJ20WJ8021-M12	12	2020	Zhejiang	Lavage fluid	NA	JBJCVQ000000000
A1121-M1	1	NA	Shandong	NA	NA	JBJFTJ000000000
Total number: 692

## Sheet: Public genome sequences
Strain	Accession	Year	Country
NCTC10085	GCA_900475645.1	1953	United_Kingdom
MGAS2096	CP000261.1	1960	Trinidad
CCUG_25570	GCA_002016575.1	1985	Sweden
MGAS2221	GCA_012572265.1	1988	Australia
5448	GCA_001021955.1	1994	Canada
M1_476	GCA_000349925.2	1994	Japan
GCH164	GCA_013315475.1	1995	South_Korea
GCH165	GCA_013315535.1	1995	South_Korea
GCH166	GCA_013315505.1	1995	South_Korea
GCH167	GCA_013315545.1	1995	South_Korea
GCH169	GCA_013315455.1	1995	South_Korea
GCH79	GCA_009789515.1	1995	South_Korea
GCH80	GCA_009789495.1	1995	South_Korea
GCH84	GCA_009857195.1	1995	South_Korea
GCH85	GCA_009857215.1	1995	South_Korea
GCH86	GCA_009857345.1	1995	South_Korea
NS488	GCA_900995885.1	1995	Australia
MGAS5005	GCA_000011765.2	1996	USA
NS696	GCA_900995385.1	1996	Australia
ABC020007794	GCA_000630145.1	1998	USA
ABC020009156	GCA_000630125.1	1999	USA
ABC020010041	GCA_000630105.1	1999	USA
emm1_S1	GCA_004118185.2	1999	Belgium
emm1_S3	GCA_005472275.1	1999	Belgium
emm1_S4	GCA_005472555.1	1999	Belgium
emm1_S5	GCA_005472725.1	1999	Belgium
emm1_S6	GCA_005472475.1	1999	Belgium
ABC020021452	GCA_000628725.1	2000	USA
ABC020005405	GCA_000630205.1	2001	USA
ABC020005716	GCA_000628325.1	2001	USA
ABC020005773	GCA_000628345.1	2001	USA
ABC020006309	GCA_000630165.1	2001	USA
ABC020006345	GCA_000628365.1	2001	USA
ABC020031290	GCA_000630705.1	2001	USA
emm1_S7	GCA_005472495.1	2001	Belgium
MGAS9429	GCA_000013485.1	2001	USA
ABC020006715	GCA_000628385.1	2002	USA
ABC020013256	GCA_000628665.1	2002	USA
ABC020013952	GCA_000630905.1	2002	USA
GCH119	GCA_009901545.1	2002	South_Korea
GCH120	GCA_009901605.1	2002	South_Korea
ABC020014529	GCA_000630885.1	2003	USA
ABC020014690	GCA_000630065.1	2003	USA
ABC020014764	GCA_000628405.1	2003	USA
ABC020015277	GCA_000630045.1	2003	USA
ABC020015285	GCA_000630025.1	2003	USA
ABC020015294	GCA_000629985.1	2003	USA
ABC020016937	GCA_000629965.1	2003	USA
ABC020017280	GCA_000628685.1	2003	USA
ABC020017774	GCA_000628705.1	2003	USA
emm1_S8	GCA_005472715.1	2003	Belgium
NS3785	GCA_900991775.1	2003	Australia
BJGAS0403	DAUHSF000000000	2004	China mainland
ABC020026946	GCA_000629925.1	2004	USA
ABC020029793	GCA_000630745.1	2004	USA
BJGAS0401	SRR6241644	2004	China mainland
BJGAS0402	SRR6241645	2004	China mainland
BJGAS0404	SRR6241627	2004	China mainland
Bra009	GCA_900985005.1	2004	Brazil
emm1_S9	GCA_005472695.1	2004	Belgium
GCH121	GCA_009887425.1	2004	South_Korea
GCH122	GCA_009887445.1	2004	South_Korea
GCH87	GCA_009857295.1	2004	South_Korea
GCH88	GCA_009857325.1	2004	South_Korea
NS4518	GCA_900991565.1	2004	Australia
BJCYGAS0501	DAUHSG000000000	2005	China mainland
ABC020029706	GCA_000631565.1	2005	USA
ABC020029711	GCA_000630765.1	2005	USA
ABC020030020	GCA_000628425.1	2005	USA
ABC020031898	GCA_000629905.1	2005	USA
ABC020032523	GCA_000630665.1	2005	USA
ABC020032535	GCA_000628465.1	2005	USA
ABC020033193	GCA_000630645.1	2005	USA
ABC020033233	GCA_000631545.1	2005	USA
ABC020033799	GCA_000630625.1	2005	USA
B17	SRR6241659	2005	China mainland
Bra051	GCA_900984455.1	2005	Brazil
C15	SRR6241658	2005	China mainland
E311	SRR6241629	2005	China mainland
E8	SRR6241630	2005	China mainland
emm1_S10	GCA_005472665.1	2005	Belgium
emm1_S11	GCA_005472455.1	2005	Belgium
GAS05134	GCA_900994005.1	2005	New_Zealand
GCH170	GCA_013315435.1	2005	South_Korea
GCH171	GCA_013315225.1	2005	South_Korea
HKU165	GCA_900990995.1	2005	China Hong Kong
HKU84	ERR060259	2005	China Hong Kong
NS4697	GCA_900991585.1	2005	Australia
BJGAS0601	DAUHSC000000000	2006	China mainland
BJGAS0602	DAUHSE000000000	2006	China mainland
ABC020032057	GCA_000628445.1	2006	USA
ABC020032183	GCA_000629885.1	2006	USA
ABC020032186	GCA_000631525.1	2006	USA
ABC020033919	GCA_000631505.1	2006	USA
ABC020035427	GCA_000629865.1	2006	USA
ABC020035446	GCA_000631485.1	2006	USA
Bra048	GCA_900984775.1	2006	Brazil
GAS06166	GCA_900994175.1	2006	New_Zealand
GAS0617	GCA_900994335.1	2006	New_Zealand
GAS06216	GCA_900994095.1	2006	New_Zealand
GAS06220	GCA_900993995.1	2006	New_Zealand
GCH142	GCA_013328035.1	2006	South_Korea
GCH94	GCA_009905935.1	2006	South_Korea
GCH97	GCA_009905945.1	2006	South_Korea
HKU98	ERR060262	2006	China Hong Kong
HKU99	ERR060263	2006	China Hong Kong
BJGAS0701	DAUHSD000000000	2007	China mainland
ABC020037542	GCA_000631465.1	2007	USA
ABC020038544	GCA_000631825.1	2007	USA
ABC020038545	GCA_000628485.1	2007	USA
ABC020039031	GCA_000631445.1	2007	USA
ABC020039391	GCA_000630585.1	2007	USA
ABC020040643	GCA_000631805.1	2007	USA
BJGAS0703	SRR6241666	2007	China mainland
Bra019	GCA_900985095.1	2007	Brazil
emm1_NS6	GCA_005472315.1	2007	Belgium
emm1_S12	GCA_005472465.1	2007	Belgium
HKU104	ERR060264	2007	China Hong Kong
HKU111	ERR060265	2007	China Hong Kong
HKU116	ERR060266	2007	China Hong Kong
BJCGAS-0801	DAUHRZ000000000	2008	China mainland
ABC020041397	GCA_000628745.1	2008	USA
ABC020044173	GCA_000630565.1	2008	USA
ABC020046158	GCA_000631725.1	2008	USA
ABC020046230	GCA_000631965.1	2008	USA
ABC020046264	GCA_000630505.1	2008	USA
ABC020046470	GCA_000630485.1	2008	USA
ABC020046559	GCA_000631705.1	2008	USA
ABC020052218	GCA_000628545.1	2008	USA
emm1_NS7	GCA_005472655.1	2008	Belgium
emm1_S13	GCA_005472505.1	2008	Belgium
HKU127	ERR060267	2008	China Hong Kong
HKU288	ERR060283	2008	China Hong Kong
HKU364	ERR060314	2008	China Hong Kong
S119	GCA_900608505.1	2008	France
ABC020046534	GCA_000631685.1	2009	USA
ABC020046688	GCA_000628785.1	2009	USA
ABC020046986	GCA_000628805.1	2009	USA
ABC020047086	GCA_000631945.1	2009	USA
ABC020047506	GCA_000631925.1	2009	USA
ABC020047635	GCA_000631905.1	2009	USA
ABC020047925	GCA_000629785.1	2009	USA
ABC020047955	GCA_000628025.1	2009	USA
ABC020047977	GCA_000628185.1	2009	USA
ABC020047993	GCA_000630465.1	2009	USA
ABC020048184	GCA_000629745.1	2009	USA
ABC020048262	GCA_000631665.1	2009	USA
ABC020048387	GCA_000628205.1	2009	USA
ABC020048395	GCA_000630445.1	2009	USA
ABC020048503	GCA_000628045.1	2009	USA
ABC020048606	GCA_000628505.1	2009	USA
ABC020049250	GCA_000630405.1	2009	USA
ABC020049545	GCA_000628065.1	2009	USA
ABC020050193	GCA_000628845.1	2009	USA
ABC020050731	GCA_000630385.1	2009	USA
ABC020052211	GCA_000628005.1	2009	USA
ABC020052216	GCA_000630345.1	2009	USA
ABC020052898	GCA_000628225.1	2009	USA
BHS0013	ERR1515370	2009	UK
BHS0356	ERR1515708	2009	UK
BHS0403	ERR1515755	2009	UK
BHS0407	ERR1515758	2009	UK
BHS0408	ERR1515759	2009	UK
BHS0419	ERR1515770	2009	UK
BHS0435	ERR1515786	2009	UK
BHS0448	ERR1515799	2009	UK
BHS0456	ERR1515807	2009	UK
BHS0462	ERR1515813	2009	UK
BHS0464	ERR1515815	2009	UK
BHS0473	ERR1515824	2009	UK
BHS0475	ERR1515826	2009	UK
emm1_S14	GCA_005472375.1	2009	Belgium
GAS09398	GCA_900993645.1	2009	New_Zealand
GAS09422	GCA_900995195.1	2009	New_Zealand
GAS09437	GCA_900994325.1	2009	New_Zealand
HKU137	ERR060268	2009	China Hong Kong
HKU138	ERR060269	2009	China Hong Kong
HKU139	ERR060270	2009	China Hong Kong
10-85	GCA_006740645.2	2010	NA
BJGAS1001	DAUHSB000000000	2010	China mainland
ABC020051161	GCA_000631405.1	2010	USA
ABC020052203	GCA_000630365.1	2010	USA
ABC020052291	GCA_000629705.1	2010	USA
ABC020052309	GCA_000628085.1	2010	USA
ABC020052313	GCA_000628105.1	2010	USA
ABC020052375	GCA_000628565.1	2010	USA
ABC020052543	GCA_000629685.1	2010	USA
ABC020052553	GCA_000628585.1	2010	USA
ABC020052877	GCA_000628605.1	2010	USA
ABC020052980	GCA_000628125.1	2010	USA
ABC020053060	GCA_000631785.1	2010	USA
ABC020053250	GCA_000628245.1	2010	USA
ABC020054184	GCA_000631765.1	2010	USA
ABC020054871	GCA_000630305.1	2010	USA
BHS0029	ERR1515384	2010	UK
BHS0037	ERR1515392	2010	UK
BHS0044	ERR1515399	2010	UK
BHS0061	ERR1515416	2010	UK
BHS0147	ERR1515502	2010	UK
BHS0164	ERR1515519	2010	UK
BHS0485	ERR1515836	2010	UK
BHS0497	ERR1515848	2010	UK
BHS0503	ERR1515854	2010	UK
BHS0707	ERR1516055	2010	UK
emm1_S15	GCA_005472605.1	2010	Belgium
GCH113	GCA_009906695.1	2010	South_Korea
HKU151	ERR060271	2010	China Hong Kong
HKU152	ERR060272	2010	China Hong Kong
HKU153	ERR060273	2010	China Hong Kong
HKU157	ERR060274	2010	China Hong Kong
HKU160	ERR060275	2010	China Hong Kong
HKU161	ERR060276	2010	China Hong Kong
patientB	GCA_900992425.1	2010	Australia
SP1-LAU	AYPA00000000	2010	Lebanon
BJCYGAS112	DAUHSJ000000000	2011	China mainland
BJCYGAS184	DAUHSH000000000	2011	China mainland
BJCYGAS52	DAUHSI000000000	2011	China mainland
BJXCGAS02	DAUHSA000000000	2011	China mainland
BJXCGAS05	DAUHRX000000000	2011	China mainland
HLJGAS2016	DAUJJM000000000	2011	China mainland
HLJGAS2022	DAUHRU000000000	2011	China mainland
SYGAS06	DAUHRW000000000	2011	China mainland
TJ11-007	DAUHRY000000000	2011	China mainland
TJ11-008	DAUHRV000000000	2011	China mainland
ABC020054973	GCA_000629645.1	2011	USA
ABC020056020	GCA_000631425.1	2011	USA
ABC020056068	GCA_000628265.1	2011	USA
ABC020056181	GCA_000628625.1	2011	USA
ABC020056765	GCA_000628145.1	2011	USA
ABC020056794	GCA_000631645.1	2011	USA
ABC020056883	GCA_000628645.1	2011	USA
ABC020056884	GCA_000631885.1	2011	USA
ABC020056885	GCA_000630265.1	2011	USA
ABC020056894	GCA_000631865.1	2011	USA
ABC020057288	GCA_000631385.1	2011	USA
ABC020057442	GCA_000628165.1	2011	USA
ABC020059502	GCA_000628285.1	2011	USA
BHS0076	ERR1515431	2011	UK
BHS0100	ERR1515455	2011	UK
BHS0101	ERR1515456	2011	UK
BHS0106	ERR1515461	2011	UK
BHS0108	ERR1515463	2011	UK
BHS0111	ERR1515466	2011	UK
BHS0122	ERR1515477	2011	UK
BHS0128	ERR1515483	2011	UK
BHS0130	ERR1515485	2011	UK
BHS0134	ERR1515489	2011	UK
BHS0135	ERR1515490	2011	UK
BJCYGAS105	SRR6241654	2011	China mainland
BJCYGAS107	SRR6241652	2011	China mainland
BJCYGAS124	SRR6241653	2011	China mainland
BJCYGAS130	SRR6241638	2011	China mainland
BJCYGAS15	GCA_000290575.1	2011	China mainland
BJCYGAS17	SRR6241670	2011	China mainland
BJCYGAS190	SRR6241667	2011	China mainland
BJCYGAS196	SRR6241633	2011	China mainland
BJCYGAS36	SRR6241635	2011	China mainland
BJCYGAS37	SRR6241668	2011	China mainland
BJJKGAS03	SRR6241664	2011	China mainland
BJJKGAS04	SRR6241639	2011	China mainland
BJJKGAS06	SRR6241655	2011	China mainland
BJJKGAS08	SRR6241628	2011	China mainland
BJJKGAS09	SRR6241640	2011	China mainland
BJJKGAS10	SRR6241641	2011	China mainland
BJJKGAS11	SRR6241646	2011	China mainland
BJJKGAS12	SRR6241647	2011	China mainland
BJJKGAS13	SRR6241648	2011	China mainland
BJJKGAS14	SRR6241649	2011	China mainland
BJJKGAS15	SRR6241642	2011	China mainland
BJJKGAS20	SRR6241643	2011	China mainland
Bra011	GCA_900984885.1	2011	Brazil
GCH114	GCA_009906625.1	2011	South_Korea
GCH128	GCA_013341175.1	2011	South_Korea
HKU16(HKU_QMH11M0907901)	GCA_000275625.1	2011	China Hong Kong
HKU17	ERR060216	2011	China Hong Kong
HKU22	ERR060221	2011	China Hong Kong
HKU23	ERR060222	2011	China Hong Kong
HKU24	ERR060223	2011	China Hong Kong
HKU25	ERR060224	2011	China Hong Kong
HKU26	ERR060225	2011	China Hong Kong
HKU29	ERR060228	2011	China Hong Kong
HKU30	GCA_900990975.1	2011	China Hong Kong
HKU306	ERR060285	2011	China Hong Kong
HKU309	ERR060286	2011	China Hong Kong
HKU360	GCA_000772185.1	2011	China Hong Kong
HKU37	ERR060235	2011	China Hong Kong
HKU383	GCA_900991025.1	2011	China Hong Kong
HKU388	ERR060338	2011	China Hong Kong
HKU397	ERR060347	2011	China Hong Kong
HKU40	ERR060238	2011	China Hong Kong
HKU42	ERR060240	2011	China Hong Kong
HKU434	GCA_900993285.1	2011	China Hong Kong
HKU44	ERR060242	2011	China Hong Kong
HKU486	GCA_900993335.1	2011	China Hong Kong
HKU487	GCA_900993345.1	2011	China Hong Kong
HKU50	ERR060248	2011	China Hong Kong
HKU52	ERR060250	2011	China Hong Kong
HKU53	ERR060251	2011	China Hong Kong
HKU54	ERR060252	2011	China Hong Kong
HKU55	ERR060253	2011	China Hong Kong
HKU56	ERR060254	2011	China Hong Kong
HKU58	ERR060256	2011	China Hong Kong
HLJGAS1051	SRR6241637	2011	China mainland
HLJGAS1056	SRR6241632	2011	China mainland
HLJGAS12011	GCA_000290595.1	2011	China mainland
HLJGAS2016	SRR6241633	2011	China mainland
HLJGAS3099	SRR6241630	2011	China mainland
Lacen1	GCA_000685485.1	2011	Brazil
Lacen2	GCA_000685505.1	2011	Brazil
Lacen3	GCA_000685565.1	2011	Brazil
Lacen4	GCA_000685545.1	2011	Brazil
MTB313	GCA_001547815.1	2011	Japan
MTB314	GCA_001547835.1	2011	Japan
NGAS305	GCA_901568775	2011	Canada
NGAS336	GCA_901568925	2011	Canada
SP5-LAU	GCA_000648835.2	2011	Lebanon
SYGAS01	SRR6241665	2011	China mainland
SYGAS02	SRR6241661	2011	China mainland
SYGAS04	SRR6241660	2011	China mainland
SYGAS05	SRR6241663	2011	China mainland
SYGAS07	SRR6241662	2011	China mainland
SYGAS08	SRR6241657	2011	China mainland
TJ11-001	GCA_003025365.1	2011	China mainland
TJ11-003	SRR6241651	2011	China mainland
TJ11-006	SRR6241650	2011	China mainland
ABC020058759	GCA_000630245.1	2012	USA
ABC020060220	GCA_000631625.1	2012	USA
ABC020060777	GCA_000631845.1	2012	USA
ABC020061424	GCA_000628305.1	2012	USA
ABC020062474	GCA_000631605.1	2012	USA
ABC020062601	GCA_000631585.1	2012	USA
ABC020064181	GCA_000631745.1	2012	USA
BHS0151	ERR1515506	2012	UK
BHS0159	ERR1515514	2012	UK
BHS0161	ERR1515516	2012	UK
BHS0162	ERR1515517	2012	UK
BHS0170	ERR1515525	2012	UK
BHS0182	ERR1515537	2012	UK
BHS0186	ERR1515541	2012	UK
Bra032	GCA_900985035.1	2012	Brazil
emm1_S16	GCA_005472365.1	2012	Belgium
emm1_S17	GCA_005472615.1	2012	Belgium
emm1_S2	GCA_004118175.2	2012	Belgium
GAS12233	GCA_900984635.1	2012	New_Zealand
GAS12243	GCA_900995115.1	2012	New_Zealand
GAS12252	GCA_900995035.1	2012	New_Zealand
GAS12271	GCA_900994765.1	2012	New_Zealand
GCH129	GCA_013166495.1	2012	South_Korea
GCH130	GCA_013341125.1	2012	South_Korea
GCH131	GCA_013341135.1	2012	South_Korea
HKU419	GCA_900619605.1	2012	China Hong Kong
HKU464	GCA_900993295.1	2012	China Hong Kong
HKU474	GCA_900993305.1	2012	China Hong Kong
HKU484	GCA_900993315.1	2012	China Hong Kong
HKU488	GCA_001051095.1	2012	China Hong Kong
SC05	GCA_002115435.1	2012	Brazil
SC06	GCA_004122835.1	2012	Brazil
V31	GCA_014050235.1	2012	Viet_Nam
emm1_S18	GCA_005472385.1	2013	Belgium
emm1_S19	GCA_005472595.1	2013	Belgium
emm1_S20	GCA_005472395.1	2013	Belgium
emm1_S21	GCA_005472355.1	2013	Belgium
emm1_S22	GCA_005472565.1	2013	Belgium
emm1_S23	GCA_005472265.1	2013	Belgium
INFECT2001_SPY	GCA_009847515.1	2013	Denmark
INFECT2002_SPY	GCA_009848225.1	2013	Denmark
NGAS750	GCA_901570005	2013	Canada
SC08	GCA_004122875.1	2013	Brazil
spy0390	GCA_002250265.1	2013	China mainland
spy0392	GCA_002250335.1	2013	China mainland
14GA1005	GCA_900985355.1	2014	New_Zealand
BHS0207	ERR1515562	2014	UK
BHS0212	ERR1515567	2014	UK
BHS0225	ERR1515580	2014	UK
BHS0226	ERR1515581	2014	UK
BHS0258	ERR1515613	2014	UK
BHS0265	ERR1515620	2014	UK
BHS0267	ERR1515622	2014	UK
BHS0275	ERR1515630	2014	UK
BHS0303	ERR1515658	2014	UK
FDAARGOS_149	GCA_001559175.2	2014	USA
GAS14243	GCA_900983875.1	2014	New_Zealand
GAS1441	GCA_900984465.1	2014	New_Zealand
GAS146	GCA_900985295.1	2014	New_Zealand
GASEMM0282	ERR1735326	2014	UK
GASEMM0288	ERR1734694	2014	UK
GASEMM0321	ERR1734401	2014	UK
GASEMM0350	ERR1734868	2014	UK
GASEMM0351	ERR1732487	2014	UK
GASEMM0408	ERR1733306	2014	UK
GASEMM0500	ERR1734816	2014	UK
GASEMM0506	ERR1735004	2014	UK
GASEMM0507	ERR1732742	2014	UK
GASEMM0617	ERR1735458	2014	UK
GASEMM0632	ERR1732584	2014	UK
GASEMM0659	ERR1734818	2014	UK
GASEMM0835	ERR1732979	2014	UK
GASEMM0902	ERR1734302	2014	UK
GASEMM1030	ERR1732554	2014	UK
INFECT2060_SPY	GCA_009847455.1	2014	Denmark
INFECT2068_SPY	GCA_009847475.1	2014	Denmark
INFECT2073_SPY	GCA_009847785.1	2014	Denmark
INFECT2075_SPY	GCA_009847385.1	2014	Denmark
INFECT2077_SPY	GCA_009847875.1	2014	Denmark
INFECT2084_SPY	GCA_009847085.1	2014	Denmark
INFECT2085_SPY	GCA_009847665.1	2014	Denmark
INFECT2092_SPY	GCA_009847375.1	2014	Denmark
INFECT2094_SPY	GCA_009848175.1	2014	Denmark
INFECT3009_SPY	GCA_009847215.1	2014	Sweden
INFECT3019_SPY	GCA_009847815.1	2014	Sweden
INFECT3021_SPY	GCA_009847115.1	2014	Sweden
INFECT5011_SPY	GCA_009848045.1	2014	Sweden
INFECT5022_SPY	GCA_009847995.1	2014	Sweden
INFECT6029_SPY	GCA_009847565.1	2014	Norway
PHE_104227	ERR1359406	2014	UK
PHE_12015	ERR1359344	2014	UK
PHE_12021	ERR1359535	2014	UK
PHE_12057	ERR1359587	2014	UK
PHE_12059	ERR1359641	2014	UK
PHE_12063	ERR1359375	2014	UK
PHE_12096	ERR1359433	2014	UK
PHE_12098	ERR1359509	2014	UK
PHE_12742	ERR1359413	2014	UK
PHE_12749	ERR1359401	2014	UK
PHE_12750	ERR1359439	2014	UK
PHE_12763	ERR1359617	2014	UK
PHE_12806	ERR1359833	2014	UK
PHE_12807	ERR1359780	2014	UK
PHE_12819	ERR1359521	2014	UK
PHE_12837	ERR1359878	2014	UK
PHE_12842	ERR1359423	2014	UK
PHE_12844	ERR1359649	2014	UK
PHE_12879	ERR1359524	2014	UK
PHE_18614	ERR1359769	2014	UK
PHE_18878	ERR1359501	2014	UK
PHE_18897	ERR1359474	2014	UK
PHE_18937	ERR1359600	2014	UK
PHE_24927	ERR1359752	2014	UK
PHE_24935	ERR1359754	2014	UK
PHE_24955	ERR1359594	2014	UK
PHE_24957	ERR1359815	2014	UK
PHE_25109	ERR1359704	2014	UK
PHE_26032	ERR1359345	2014	UK
PHE_26036	ERR1359706	2014	UK
PHE_26047	ERR1359746	2014	UK
PHE_26083	ERR1359570	2014	UK
PHE_27659	ERR1359351	2014	UK
PHE_27660	ERR1359620	2014	UK
PHE_27712	ERR1359496	2014	UK
PHE_30623	ERR1359482	2014	UK
PHE_30630	ERR1359562	2014	UK
PHE_32228	ERR1359634	2014	UK
PHE_32266	ERR1359712	2014	UK
PHE_32268	ERR1359394	2014	UK
PHE_32280	ERR1359374	2014	UK
PHE_32281	ERR1359642	2014	UK
PHE_32288	ERR1359717	2014	UK
PHE_33019	ERR1359654	2014	UK
PHE_33033	ERR1359688	2014	UK
PHE_33045	ERR1359682	2014	UK
PHE_33051	ERR1359880	2014	UK
PHE_33056	ERR1359751	2014	UK
PHE_33060	ERR1359342	2014	UK
PHE_33063	ERR1359365	2014	UK
PHE_33064	ERR1359844	2014	UK
PHE_33069	ERR1359687	2014	UK
PHE_37622	ERR1359775	2014	UK
PHE_37687	ERR1359481	2014	UK
PHE_37690	ERR1359549	2014	UK
PHE_39587	ERR1359757	2014	UK
PHE_39589	ERR1359358	2014	UK
PHE_39591	ERR1359396	2014	UK
PHE_39597	ERR1359349	2014	UK
PHE_39603	ERR1359470	2014	UK
PHE_39604	ERR1359697	2014	UK
PHE_39609	ERR1359596	2014	UK
PHE_45823	ERR1359522	2014	UK
PHE_45825	ERR1359591	2014	UK
PHE_45834	ERR1359590	2014	UK
PHE_55106	ERR1359589	2014	UK
TSPY383	GCA_020827115.1	2014	USA
20154127	GCA_901564515	2015	USA
20154145	GCA_901564405	2015	USA
20154557	GCA_901564905	2015	USA
20154623	GCA_901564875	2015	USA
20154787	GCA_901565005	2015	USA
20154803	GCA_901565035	2015	USA
20154821	GCA_901565155	2015	USA
20156414	GCA_901565765	2015	USA
BHS0510	ERR1515861	2015	UK
BHS0511	ERR1515862	2015	UK
BHS0518	ERR1515869	2015	UK
BHS0521	ERR1515872	2015	UK
BHS0524	ERR1515875	2015	UK
BHS0547	ERR1515898	2015	UK
BHS0580	ERR1515929	2015	UK
BHS0581	ERR1515930	2015	UK
BHS0586	ERR1515935	2015	UK
BHS0597	ERR1515946	2015	UK
BHS0599	ERR1515948	2015	UK
BHS0603	ERR1515952	2015	UK
BHS0614	ERR1515962	2015	UK
BHS0619	ERR1515967	2015	UK
BHS0624	ERR1515972	2015	UK
BHS0628	ERR1515976	2015	UK
BHS0631	ERR1515979	2015	UK
BHS0632	ERR1515980	2015	UK
BHS0634	ERR1515982	2015	UK
BHS0643	ERR1515991	2015	UK
BHS0644	ERR1515992	2015	UK
BHS0646	ERR1515994	2015	UK
BHS0648	ERR1515996	2015	UK
BHS0661	ERR1516009	2015	UK
BHS0666	ERR1516014	2015	UK
BHS0674	ERR1516022	2015	UK
BHS0678	ERR1516026	2015	UK
BHS0679	ERR1516027	2015	UK
BHS0689	ERR1516037	2015	UK
BHS0693	ERR1516041	2015	UK
BHS0697	ERR1516045	2015	UK
GASEMM2538	ERR1732875	2015	UK
GASEMM2545	ERR1734262	2015	UK
GASEMM2555	ERR1734038	2015	UK
GASEMM2565	ERR1732547	2015	UK
GASEMM2634	ERR1734593	2015	UK
GASEMM2644	ERR1734957	2015	UK
GASEMM2659	ERR1734174	2015	UK
GASEMM2677	ERR1732667	2015	UK
GASEMM2703	ERR1732988	2015	UK
GASEMM2727	ERR1733384	2015	UK
GASEMM2755	ERR1734897	2015	UK
GASEMM2757	ERR1733013	2015	UK
GASEMM2758	ERR1734726	2015	UK
GASEMM2859	ERR1734254	2015	UK
GASEMM2877	ERR1733051	2015	UK
GASEMM2909	ERR1733629	2015	UK
GASEMM2921	ERR1734790	2015	UK
GASEMM2943	ERR1732705	2015	UK
GASEMM2954	ERR1734968	2015	UK
GASEMM2961	ERR1734769	2015	UK
GASEMM2963	ERR1735365	2015	UK
GASEMM2971	ERR1732863	2015	UK
GASEMM2978	ERR1733348	2015	UK
GASEMM2987	ERR1732580	2015	UK
GASEMM3007	ERR1734523	2015	UK
GASEMM3017	ERR1735244	2015	UK
GASEMM3019	ERR1733279	2015	UK
GCH133	GCA_013341115.1	2015	South_Korea
GCH134	GCA_013341215.1	2015	South_Korea
INFECT2106_SPY	GCA_009848105.1	2015	Denmark
INFECT2118_SPY	GCA_009848085.1	2015	Denmark
INFECT2146_SPY	GCA_009847225.1	2015	Denmark
INFECT3041_SPY	GCA_009847125.1	2015	Sweden
INFECT4008_SPY	GCA_009847685.1	2015	Sweden
INFECT5031_SPY	GCA_009846925.1	2015	Sweden
INFECT5033_SPY	GCA_009847955.1	2015	Sweden
INFECT6039_SPY	GCA_009847555.1	2015	Norway
INFECT6045_SPY	GCA_009847505.1	2015	Norway
20161065	GCA_901566515	2016	USA
20161447	GCA_901566625	2016	USA
20162629	GCA_901566915	2016	USA
20162642	GCA_901566935	2016	USA
ERR2396421	ERR2396421	2016	UK
ERR2396422	ERR2396422	2016	UK
ERR2396423	ERR2396423	2016	UK
ERR2396424	ERR2396424	2016	UK
ERR2396425	ERR2396425	2016	UK
ERR2396427	ERR2396427	2016	UK
ERR2396429	ERR2396429	2016	UK
ERR2396430	ERR2396430	2016	UK
ERR2396433	ERR2396433	2016	UK
ERR2396434	ERR2396434	2016	UK
ERR2396435	ERR2396435	2016	UK
ERR2396436	ERR2396436	2016	UK
ERR2396437	ERR2396437	2016	UK
ERR2396438	ERR2396438	2016	UK
ERR2396439	ERR2396439	2016	UK
ERR2396440	ERR2396440	2016	UK
ERR2396441	ERR2396441	2016	UK
ERR2396442	ERR2396442	2016	UK
ERR2396443	ERR2396443	2016	UK
ERR2396444	ERR2396444	2016	UK
ERR2396445	ERR2396445	2016	UK
ERR2396446	ERR2396446	2016	UK
ERR2396447	ERR2396447	2016	UK
ERR2396448	ERR2396448	2016	UK
ERR2396449	ERR2396449	2016	UK
ERR2396450	ERR2396450	2016	UK
ERR2396450	ERR2396450	2016	UK
ERR2396451	ERR2396451	2016	UK
ERR2396452	ERR2396452	2016	UK
ERR2396453	ERR2396453	2016	UK
ERR2396454	ERR2396454	2016	UK
ERR2396455	ERR2396455	2016	UK
ERR2396456	ERR2396456	2016	UK
ERR2396457	ERR2396457	2016	UK
ERR2396458	ERR2396458	2016	UK
ERR2396459	ERR2396459	2016	UK
ERR2396461	ERR2396461	2016	UK
ERR2396462	ERR2396462	2016	UK
ERR2396463	ERR2396463	2016	UK
ERR2533384	ERR2533384	2016	UK
ERR2533385	ERR2533385	2016	UK
ERR2533386	ERR2533386	2016	UK
ERR2533387	ERR2533387	2016	UK
ERR2533388	ERR2533388	2016	UK
ERR2533389	ERR2533389	2016	UK
ERR2533390	ERR2533390	2016	UK
ERR2533392	ERR2533392	2016	UK
ERR2533393	ERR2533393	2016	UK
ERR2533394	ERR2533394	2016	UK
ERR2533395	ERR2533395	2016	UK
ERR2533396	ERR2533396	2016	UK
ERR2533397	ERR2533397	2016	UK
ERR2533398	ERR2533398	2016	UK
ERR2533399	ERR2533399	2016	UK
ERR2533400	ERR2533400	2016	UK
ERR2533401	ERR2533401	2016	UK
ERR2533402	ERR2533402	2016	UK
ERR2533403	ERR2533403	2016	UK
ERR2533404	ERR2533404	2016	UK
ERR2533405	ERR2533405	2016	UK
ERR2533406	ERR2533406	2016	UK
ERR2533407	ERR2533407	2016	UK
ERR2533408	ERR2533408	2016	UK
ERR2533409	ERR2533409	2016	UK
ERR2533410	ERR2533410	2016	UK
ERR2533411	ERR2533411	2016	UK
ERR2533412	ERR2533412	2016	UK
ERR2533413	ERR2533413	2016	UK
ERR2533414	ERR2533414	2016	UK
ERR2533415	ERR2533415	2016	UK
ERR2533416	ERR2533416	2016	UK
ERR2533417	ERR2533417	2016	UK
ERR2533418	ERR2533418	2016	UK
ERR2533419	ERR2533419	2016	UK
ERR2533420	ERR2533420	2016	UK
ERR2533421	ERR2533421	2016	UK
ERR2533422	ERR2533422	2016	UK
ERR2533423	ERR2533423	2016	UK
ERR2533424	ERR2533424	2016	UK
ERR2533425	ERR2533425	2016	UK
ERR2533426	ERR2533426	2016	UK
ERR2533427	ERR2533427	2016	UK
ERR2533428	ERR2533428	2016	UK
ERR2533429	ERR2533429	2016	UK
ERR2533430	ERR2533430	2016	UK
ERR2533431	ERR2533431	2016	UK
ERR2533432	ERR2533432	2016	UK
FDAARGOS_534	GCA_003812645.1	2016	USA
GAS552	GCA_019335745.1	2016	China mainland
GAS561	GCA_019335615.1	2016	China mainland
GAS669	GCA_019335825.1	2016	China mainland
GAS688	GCA_019335525.1	2016	China mainland
GAS738	GCA_019335765.1	2016	China mainland
GAS744	GCA_019335645.1	2016	China mainland
GAS772	GCA_019335605.1	2016	China mainland
GAS865	GCA_019335555.1	2016	China mainland
GAS874	GCA_019335425.1	2016	China mainland
GAS875	GCA_019335925.1	2016	China mainland
GCH117	GCA_009906745.1	2016	South_Korea
GCH136	GCA_013327895.1	2016	South_Korea
INFECT3046_SPY	GCA_009847055.1	2016	Sweden
INFECT3054_SPY	GCA_009847775.1	2016	Sweden
ISR3	GCA_900106435.1	2016	Switzerland
ISR4	GCA_900106485.1	2016	Switzerland
SPY2006	GCA_008122095.1	2016	Denmark
SPY5006A	GCA_008122075.1	2016	Sweden
SPY5006B	GCA_008122055.1	2016	Sweden
SPY5006C	GCA_008122065.1	2016	Sweden
SPY5448	GCA_006364945.1	2016	Sweden
SPY6013	GCA_008121975.1	2016	Norway
SPY6016	GCA_008121985.1	2016	Norway
SPY6018	GCA_008122015.1	2016	Norway
SPY6025	GCA_008121955.1	2016	Norway
SPY8157	GCA_006364865.1	2016	Sweden
GAS1117	GCA_019335545.1	2017	China mainland
GAS1208	GCA_019335965.1	2017	China mainland
GAS1299	GCA_019335345.1	2017	China mainland
GAS1483	GCA_019335395.1	2017	China mainland
GAS1693	GCA_019335565.1	2017	China mainland
GAS1843	GCA_019335885.1	2017	China mainland
GAS1854	GCA_019335785.1	2017	China mainland
GAS270	GCA_019335705.1	2017	China mainland
GAS303	GCA_019335945.1	2017	China mainland
GAS306	GCA_019336135.1	2017	China mainland
GAS315	GCA_019336125.1	2017	China mainland
GAS318	GCA_019335995.1	2017	China mainland
GAS335	GCA_019335985.1	2017	China mainland
GAS337	GCA_019336025.1	2017	China mainland
GAS343	GCA_019335725.1	2017	China mainland
GAS350	GCA_019335675.1	2017	China mainland
GAS367	GCA_019336105.1	2017	China mainland
GAS961	GCA_019335455.1	2017	China mainland
GCH103	GCA_009906095.1	2017	South_Korea
GCH104	GCA_009906035.1	2017	South_Korea
GCH105	GCA_009906135.1	2017	South_Korea
GCH108	GCA_009906255.1	2017	South_Korea
GCH118	GCA_009906685.1	2017	South_Korea
GCH174	GCA_013315315.1	2017	South_Korea
GCH98	GCA_009905985.1	2017	South_Korea
INFECT3061_SPY	GCA_009847735.1	2017	Sweden
INFECT5045_SPY	GCA_009846965.1	2017	Sweden
MUMCMC1953	GCA_002872275.1	2017	India
MUMCMC2276	GCA_002268485.1	2017	India
MUMCMC261	GCA_002872315.1	2017	India
MUMCMC317	GCA_002268475.1	2017	India
MUMCMC51	GCA_002268555.1	2017	India
MUMCMC650	GCA_002268575.1	2017	India
MUMCMC661	GCA_002268585.1	2017	India
S417	GCA_009846875.1	2017	China mainland
SP1336	GCA_004193935.1	2017	Australia
spy-498	GCA_010499565.1	2017	China mainland
ST36	GCA_002250425.1	2017	India
GAS1858	GCA_019335895.1	2018	China mainland
GAS1869	GCA_019335445.1	2018	China mainland
GAS1907	GCA_019335365.1	2018	China mainland
GAS1909	GCA_019335355.1	2018	China mainland
GAS1914	GCA_019335835.1	2018	China mainland
GAS1916	GCA_019335465.1	2018	China mainland
GAS1966	GCA_019335805.1	2018	China mainland
GAS2000	GCA_019335845.1	2018	China mainland
GAS2001	GCA_019335315.1	2018	China mainland
GAS2015	GCA_019335505.1	2018	China mainland
GAS373	GCA_019336085.1	2018	China mainland
GAS377	GCA_019335665.1	2018	China mainland
GAS390	GCA_019336045.1	2018	China mainland
GAS424	GCA_019336065.1	2018	China mainland
GCH140	GCA_013327975.1	2018	South_Korea
M11318	GCA_017132795.1	2018	Australia
SHZ-1	GCA_022494495.1	2018	China mainland
TSPY1687	GCA_018140985.1	2018	USA
spy-1326	GCA_010499535.1	2019	China mainland
spy-1397	GCA_010499515.1	2019	China mainland
21SPY7071	GCA_023380045.1	2021	China mainland
HKU189	ERR060279	2005-07-15	China Hong Kong
HKU294	ERR060284	2008-03-12	China Hong Kong
HKU283	ERR060282	2008-05-22	China Hong Kong
HKU361	ERR060311	2008-06-02	China Hong Kong
HKU362	ERR060312	2008-06-10	China Hong Kong
HKU363	ERR060313	2008-08-28	China Hong Kong
HKU366	ERR060316	2009-12-29	China Hong Kong
HKU367	ERR060317	2010-01-06	China Hong Kong
HKU368	ERR060318	2010-06-18	China Hong Kong
HKU369	ERR060319	2010-10-29	China Hong Kong
HKU370	ERR060320	2010-11-05	China Hong Kong
HKU371	ERR060321	2010-12-02	China Hong Kong
HKU372	ERR060322	2010-12-22	China Hong Kong
HKU333	ERR060297	2011-01-06	China Hong Kong
HKU27	ERR060226	2011-01-14	China Hong Kong
HKU28	ERR060227	2011-01-14	China Hong Kong
HKU31	ERR060229	2011-02-08	China Hong Kong
HKU32	ERR060230	2011-02-08	China Hong Kong
HKU33	ERR060231	2011-02-10	China Hong Kong
HKU34	ERR060232	2011-02-16	China Hong Kong
HKU35	ERR060233	2011-02-16	China Hong Kong
HKU36	ERR060234	2011-02-21	China Hong Kong
HKU38	ERR060236	2011-02-28	China Hong Kong
HKU39	ERR060237	2011-02-28	China Hong Kong
HKU343	ERR060301	2011-03-02	China Hong Kong
HKU347	ERR060302	2011-03-11	China Hong Kong
HKU41	ERR060239	2011-03-11	China Hong Kong
HKU43	ERR060241	2011-03-14	China Hong Kong
HKU334	ERR060298	2011-03-22	China Hong Kong
HKU336	ERR060300	2011-03-22	China Hong Kong
HKU18	ERR060217	2011-03-25	China Hong Kong
HKU330	ERR060295	2011-03-25	China Hong Kong
HKU331	ERR060296	2011-03-27	China Hong Kong
HKU19	ERR060218	2011-03-29	China Hong Kong
HKU20	ERR060219	2011-04-01	China Hong Kong
HKU45	ERR060243	2011-04-06	China Hong Kong
HKU46	ERR060244	2011-04-15	China Hong Kong
HKU21	ERR060220	2011-04-18	China Hong Kong
HKU349	ERR060303	2011-04-19	China Hong Kong
HKU47	ERR060245	2011-04-19	China Hong Kong
HKU48	ERR060246	2011-05-04	China Hong Kong
HKU49	ERR060247	2011-05-09	China Hong Kong
HKU320	ERR060289	2011-05-17	China Hong Kong
HKU51	ERR060249	2011-05-17	China Hong Kong
HKU328	ERR060294	2011-05-25	China Hong Kong
HKU324	ERR060291	2011-05-29	China Hong Kong
HKU326	ERR060292	2011-06-08	China Hong Kong
HKU327	ERR060293	2011-06-10	China Hong Kong
HKU322	ERR060290	2011-06-11	China Hong Kong
HKU403	ERR060353	2011-06-14	China Hong Kong
HKU311	ERR060287	2011-06-15	China Hong Kong
HKU315	ERR060288	2011-06-17	China Hong Kong
HKU373	ERR060323	2011-06-17	China Hong Kong
HKU374	ERR060324	2011-06-21	China Hong Kong
HKU375	ERR060325	2011-06-21	China Hong Kong
HKU335	ERR060299	2011-06-23	China Hong Kong
HKU355	ERR060305	2011-06-23	China Hong Kong
HKU357	ERR060307	2011-06-23	China Hong Kong
HKU376	ERR060326	2011-06-24	China Hong Kong
HKU377	ERR060327	2011-06-24	China Hong Kong
HKU378	ERR060328	2011-06-24	China Hong Kong
HKU379	ERR060329	2011-06-24	China Hong Kong
HKU380	ERR060330	2011-06-24	China Hong Kong
HKU381	ERR060331	2011-06-24	China Hong Kong
HKU382	ERR060332	2011-06-24	China Hong Kong
HKU384	ERR060334	2011-06-24	China Hong Kong
HKU385	ERR060335	2011-06-24	China Hong Kong
HKU386	ERR060336	2011-06-24	China Hong Kong
HKU387	ERR060337	2011-06-24	China Hong Kong
HKU356	ERR060306	2011-06-25	China Hong Kong
HKU358	ERR060308	2011-06-25	China Hong Kong
HKU389	ERR060339	2011-06-25	China Hong Kong
HKU390	ERR060340	2011-06-25	China Hong Kong
HKU391	ERR060341	2011-06-25	China Hong Kong
HKU392	ERR060342	2011-06-25	China Hong Kong
HKU393	ERR060343	2011-06-25	China Hong Kong
HKU394	ERR060344	2011-06-25	China Hong Kong
HKU395	ERR060345	2011-06-25	China Hong Kong
HKU396	ERR060346	2011-06-27	China Hong Kong
HKU398	ERR060348	2011-06-27	China Hong Kong
HKU399	ERR060349	2011-06-27	China Hong Kong
HKU400	ERR060350	2011-06-27	China Hong Kong
HKU401	ERR060351	2011-06-27	China Hong Kong
HKU359	ERR060309	2011-06-28	China Hong Kong
HKU402	ERR060352	2011-06-28	China Hong Kong
HKU354	ERR060304	2011-06-29	China Hong Kong
HKU74	ERR060257	2005	China Hong Kong
HKU81	ERR060258	2005	China Hong Kong
HKU86	ERR060260	2005	China Hong Kong
A1138	GCA_900983495.1	2007-2010	India
A1144	GCA_900983505.1	2007-2010	India
A1152	GCA_900983475.1	2007-2010	India
A1268	GCA_900983445.1	2007-2010	India
A879	GCA_900983725.1	2007-2010	India
NGAS035	GCA_901568255	2010-2013	Canada
NGAS056	GCA_901568245	2010-2013	Canada
NGAS076	GCA_901568285	2010-2013	Canada
NGAS078	GCA_901568345	2010-2013	Canada
NGAS083	GCA_901568325	2010-2013	Canada
NGAS202	GCA_901568555	2010-2013	Canada
NGAS255	GCA_901568645	2010-2013	Canada
NGAS297	GCA_901568725	2010-2013	Canada
NGAS408	GCA_901569105	2010-2013	Canada
NGAS413	GCA_901569065	2010-2013	Canada
NGAS425	GCA_901569155	2010-2013	Canada
NGAS450	GCA_901569165	2010-2013	Canada
NGAS623	GCA_901569605	2010-2013	Canada
NGAS657	GCA_901569775	2010-2013	Canada
GASEMM0136	GCA_901567135	2014-2015	UK
GASEMM0832	GCA_901567205	2014-2015	UK
GASEMM1878	GCA_901567625	2014-2015	UK
970_SDYS	GCA_001076015.1	NA	USA
A20	GCA_000307535.1	NA	China Taiwan
AP1	GCA_000993765.1	NA	Czech_Republic
ATCC_11434	GCA_007990695.1	NA	NA
BJGASJ22	SRR6241656	NA	China mainland
CCUG_4207	GCA_001982785.1	NA	United_Kingdom
CCUG_4207	GCA_004028355.1	NA	United_Kingdom
CCUG_47803	GCA_002014815.1	NA	USA
DSM_20565	GCA_000421785.1	NA	NA
emm1	GCA_005164585.1	NA	India
FDAARGOS_668	GCA_008694005.1	NA	USA
FDAARGOS_774	GCA_006364235.1	NA	USA
GA41345	GCA_000444035.1	NA	NA
PartK-Spyogenes-RM8376	GCA_022869605.1	NA	NA
PEI-B-P-20	GCA_900108785.1	NA	NA
SPYOINFP20011	GCA_900231885.1	NA	NA
Total number:862

## Sheet: Number of genomes per year 
Year	Number of China genome sequences
1993	22
1994	9
1995	0
1996	0
1997	0
1998	0
1999	0
2000	0
2001	0
2002	0
2003	0
2004	3
2005	15
2006	4
2007	62
2008	31
2009	4
2010	12
2011	205
2012	68
2013	57
2014	61
2015	50
2016	71
2017	82
2018	81
2019	95
2020	13
Total number	945
