# Supplementary material for: Genomic epidemiology of dominant lineages of Streptococcus pyogenes emm types between 1993-2020, in China
Source: Research Square preprint supplement (doi:10.21203/rs.3.rs-5922137/v1), 2025-02-27
Supplement: Supplementary file 2 [file b8264a457723b205796d2879.xlsx]

## Sheet: Sheet1
MGE	Reference genome accession	Virulence gene							Antimicrobial resistance gene
		ssa	speC	sda	spd1	speA	sdaD2	spd3	tetM	ermB	ermTR	tetO
Phi_HKU16	AFRY01000001.1	+	+	-	+	-	-	-	-	-	-	-
Phi_HKU.ssa	GCA_000772185.1	+	-	-	-	-	-	-	-	-	-	-
Phi_MGAS2096.1	CP000261	-	+	-	+	-	-	-	-	-	-	-
Phi_SF370.1	CP160045.1	-	+	-	+	-	-	-	-	-	-	-
Phi_NS488.1	ERR033845	-	+	-	+	-	-	-	-	-	-	-
Phi_HKU160.1	ERR060275	-	+	+	+	-	-	-	-	-	-	-
Phi_MGAS9429.1	CP000259	-	+	-	+	-	-	-	-	-	-	-
Phi_HKU43.1	ERR060241	-	+	-	+	-	-	-	-	-	-	-
Phi_HKU81.4	ERR060258	-	+	-	+	-	-	-	-	-	-	-
Phi_HKU165.4	ERR060277	+	-	-	-	-	-	-	-	-	-	-
Phi_MGAS5005.1	GCA_000011765.2	-	-	-	-	+	-		-	-	-	-
Phi_MGAS5005.2	GCA_000011765.2	-	-	-	-	-	-	+	-	-	-	-
Phi_MGAS5005.3	GCA_000011765.2	-	-	-	-	-	+	-	-	-	-	-
Phi_HKU488.vir	ERR033845	+	+	-	+	-	-	-	-	-	-	-
Phi_HKU160.1	ERR060275	-	+	-	+	-	-	-	-	-	-	-
ICE_emm12	AFRY01000001.1	-	-	-	-	-	-	-	+	+	-	-
ICE_HKU397	ERR060347	-	-	-	-	-	-	-	+	+	-	-
ICE_HLJGAS2022	ERR986059	-	-	-	-	-	-	-	+	+	-	-
ICE_HKU165	GCA_900990995.1	-	-	-	-	-	-	-	+	-	+	-
ICE_HKU488	GCA_001051095.1	-	-	-	-	-	-	-	+	+	-	-
ICE_HKU372	ERR060322	-	-	-	-	-	-	-	-	+	-	-
ICE_MGAS2096	CP000261	-	-	-	-	-	-	-	-	-	-	+
